# Supplementary material for: Selection of Reference Genes in Evodia rutaecarpa var. officinalis and Expression Patterns of Genes Involved in Its Limonin Biosynthesis
Source: MDPI journal article supplement (doi:10.3390/plants12183197), 2023-09-07
Supplement: s1 [file s1]

# Supplementary Materials

Text S1: Sequences of candidate reference genes.

## *Actin-1*

ATGACTCAGATTATGTTTGAACTTTCAATGTGACAGCAATGTATGTTGCCATCCAGG  
CCGTTCTATCTCTATATGCCAGTGGTCGTACAACCTGGTATTGTGCTGGATTCTGGTGAT  
GGTGTGTCTCATACTGTGCCAATCTATGATGGATATGCCCTTCCCCATGCAATTCTTCG  
TTTGACCTGGCTGGTCGTGATCTCACTGATGCATTGATGAACATTCTTACTGAGAGA  
GGGTACATGTTTACCACCACAGCCGAGCGGGAAATTGTCCGTGACATGAAGGAGAA  
GCTTGCTTATGTTGCTCTAGACTATGAGCAAGAACTTGAGACTGCCAAGAGCAGCTCT  
TCTGTTGAGAAGAACTACGAGCTGCCTGATGGCCAGGTGATAACCATTGGAGCTGAG  
AGGTTCCGTTGCCCAGAAGTCCTCTTCCAGCCATTTCTCATCGGAATGGAAGCTGCCG  
GTATCCATGAGACTACCTACAACCTCCATCATGAAGTGTGACGTGGATATCAGAAAGG  
ATCTGTATGGTAACATTGTGCTCAGTGGTGGTTCGACTATGTTCCCTGGTATTAGCCGA  
CCGTATGAGCAAGGAAATCACTGCACTTGCTCCAAGCAGCATGAAGATTAA

## *Histone H3*

ATGGCCCGTACTAAGCAAACCTGCTCGTAAATCAACTGGAGGAAAGGCACCTAGGAA  
GCAACTCGCTACCAAGGCCCGCTGTAAGTCTGCTCCCACAACCGGTGGAGTCAAGAA  
GCCACACCGTTACCGCCCTGGAAGTGTGCGCCCTTCGTGAAATTCGAAAGTACCAGAA  
GAGTACCGAGCTACTGATCAGGAAACTCCCATTCCAGAGACTTGTTTCGTGAAATAGC  
CAAGGACTTCAAGACTGATCTGCGTTTCCAGAGCCACGCTGTCCTGGCCCTACAGGA  
GGCAGCCGAGGCTTACCTCGTCGGTCTCTTTGAGGACACTCCCCTCTGTGCTATTAC  
GCCAAGCGTGTGACCATTATGCCCAAGGATATCGAGCTTGCCCGTAGGATCCGCGGT  
GAGCGTGCTTAA

## *UBQ*

ATGCAGATCTACGTCAAAACCCTAACCGGCAAAACAATCACTCTCGAAGTTGAGAGT  
TCCGACACTATTGATAACGTTAAGGCCAAGATCCAAGACAAGGAGGGACACCCTCCT  
GATCAGCAGCGCCTCATCTTCGCCGCCAAGCAATTGGAAGACGGACGGACCTTGGCT  
GACTATAATATCCCGAAGGAATCAACCCTTCATCTTGTCTCAGGCTCCGTGGTGGCA  
TGCAGATCTTCGTCAAAACCCTTACCGGCAAGACGATCACGCTCGAGGTTGAGAGTT  
CAGACACGATCGATAACGTCAAGGCCAAGAATCAAGACAATGAGGGGATCCCACCA  
GACCAGCAGACGCTGATCTTTGCCGGAAGCAACTCGAAGACGGACGCACCTTGGC  
CGACTACAATATCCAGAAGGAATCAACCCTTCATCTTGTCTCAGGCTCCGTGGTGGT  
ATGCAGATCTTCGTCAAAACCCTAAGTGGGAAGACGATCACTCTCGAGGTGGAGAGT  
TCAGATACTATCGATAATGTCAAGGCCAAGATCCAGGACAAAGACGGCATCCCACC  
GGATCAGCAAAGATTGATCTTCGCCGGCAAGCAACTCGAAGATGGCCGTACTTTGGC  
TGATTATTACATTCAGAAAGAGTCAACGCTCCATCTGGTGCTTCGTCTACGTGGTAGG  
CATGCAGATTTTTGTAA

## *GAPDH*

ATGTTTCGTTGTTGGTGTCAATGAGCACGAGTACAAGCCAGAACTTAACCTTGTGTCCA  
ATGCTAGCTGCACCACCAACTGCCTTGCTCCGCTCGCCAAGGTCATTCATGACTGGTT  
TGGCATTGTTGAGGGTTTGATGACCACTGTTCACTCTATCACTGCCACCCAGAAAAC  
GTTGATGGGCCATCATCAAAGGACTGGAGAGGTGGCAGGGCTGCTTCATTCAACATC  
ATTCCTAGCAGTACTGGAGCTGCTAAGGCTGTTGGAAAGGTCTTACCTTCTTTGAATG

GAAAAGTATTGGTATGGCTTTCCGTGTACCCACGGTTGATGTCTATGTGGTTGACCT  
CACAGTGAGGATGGAGAAGGAAGCTTCTTATGATGAAATTAAGCTGCCATCAAGG  
AGGAGTCCGAGGGAAAAGTAAAGGGTATCTTGGGATACACTGAGGATGATGTGGTTT  
CTACGGACTTTATTGGCGACAACAAGTCAAGTTTCTTTGATGCCAAGGCTGGTATTGC  
TTTGAGCAAGAATTTTGTGAAGCTTGTGCGGTGGTATGACAATGAGTGGGGCTACAGT  
TCCCGTGTGGTTGATCTGATTGTCCACATGTCTGAAGACCCAGTAA

***UBQ 10***

ATGCAGATCTTTGTAAAGACCCTCACTGGAAAACTATCACCTTGAGGTGGAAAGC  
TCTGACACCATTGACAATGTCAAAGCCAAAATTGAGGACAAGGAAGGGATCCCACC  
AGACCAGCAAAGGCTCATCTTTGCCGGAAAACAACCTTGAGGATGGACGCACACTTGC  
CGACTATAACATCCAGAAGGAATCTACCCTTCATTTGGTTCTTCGTCTCAGGGGTGGC  
ATGCAGATTTTCGTGAAAACCCTGACTGGTAAAACTATAACTTTGGAAGTTGAAAGCT  
CTGACACGATTGACAATGTCAAGGCTAAGATCCAGGACAAGGAGGGCATCCCACCA  
GACCAGCAGAGGTTGATCTTTGCCGGCAAACAACCTTGAGGATGGCCGTACTCTTGCT  
GACTACAACATTCAAAAGGAGTCAACCCTTCACCTGGTGCTCCGTCTCCGTGGTGGTA  
TGCAGATCTTTGTGAAAACCCTCACTGGAAAAACAATCACTCTTGAGGTTGAAAGCT  
CTGACACCATTGACAATGTAAAGCAAAAATTCAAGATAAGGAGGGTATACCACCA  
GATCAGCAGAGGCTTATTTTGTGTAAGAGCAGCTTGAAGACGGAAGGACCCTTGCA  
GACTATAACATCCAGAAAGAATCCACGCTACACTTGGTTCTTCGCCTCCGTGGTGGTA  
TGCAGATTTTGTGAAGACCCTCACTGGGAAAACCATCACCTTGGAGGTTGAGAGTTC  
AGACACCATTGACAATGTAAAGGCTAAGATCCAGGATAAGGAGGGGATTCCACCGG  
ACCAGCAGAGGTTGATCTTTGCTGGAAAGCAACTGGAGGATGGAAGTACTCTTGCTG  
ATTACAACATCCAGAAGGTGTCCACTCTGCATCTTGTTCTTCGTCTCCGTGGAGGTTTC  
TGA

***CHS 1***

ATGCTGACCGTCGATGAAGTTCGCAAGTCTCAACGTGCCGTCCGTCCGGCCACGATC  
ATGGCCATCGGAACGGCAACTCCTCCGAAGTGTGTTGACCAAAGCACATATCCTGAC  
TATTATTTTCGTATCACAAAGAGAGAACACATGACTGAACTTAAAGAGAAATTTAAG  
CGCATGTGTGACAAATCCATGATCAAGAAGAGATACATGTACTTGACTGAAAATATA  
TTGAAAGAAAACCTAATGTGTGTGAATACATGGAACCGTCAATAGATGCTAGGCAA  
GATATGGTTGTAGTTGAGGTACCAAAGCTAGGCAAAGAAGCAGCCACCAAGGCCATT  
AAAGAATGGGGGCAGCCCAAATCCAAAATCACCCACTTGGTCTTTTGCCTACTAGT  
GGTGTGATATGCCTGGGGCCGATTACCAACTACCAAACCTCTTGGGCCTTCGCCCTT  
CCGTAAACGTCTCATGATGTACCAACAAGGCTGTTTCGCCGGCGGCACGGTGCTCCG  
TCTTGCCAAAGACCTCGCCGAGAACAACAAGGCGCCCGTGTCTCTCGTGTGCTC  
TGAGATAACTGCAGTTACTTTCCGGGGTCCCAGTGACACCCATCTTGATAGCCTTGTA  
GGCCAAGCTTTGTTTGGTGACGGTGCTGCTGCTATTATTATTGGCTCTGATCCTGTTCA  
ACGGCTCGAAAAGCCTATCTTTGAACTGGTCTCTGCGGCCCAAACAATATTACCCGAT  
AGTGAAGGGGCTATTGATGGACACCTCCGTGAAATTGGGCTTACGTTTCACCTACTCA  
AGGATGTTCCCTGGGCTAATTTGGAAGAACATCCAAAAAGTCTCACTGAGGCATTCA  
ACCCATTGGGTATCTCGGACTGGAAGTCAATTTCTGGATAGCGCACCCCGGTGGGCG  
TGCTATTTTGACCAGGTTGAGGAGAAGTTGGGCCTGA

***β-TUB6***

ATGAGAGAAATCTTGACATTCAAGGAGGCCAATGCGGCAACAAAATCGGTTCCAA

ATTCTGGGAGGTCATTTGCGACGAGCATGGCGTGGACCCACCGGGAGGTACAGAGG  
AGACGCTGACTCGGATCTTCAATTGGAGCGGATCAATGTCTACTACAATGAAGCTTCC  
GGTGGAAAGGTACGTGCCTAGGGCTATCCTCATGGATCTTGAACCCGGTACTATGGAT  
AGTATCAGATCTGGACCCTACGGCCAGATCTTTCGACCTGATAACTTCGTCTTTGGGC  
AATCCGGTGCCGGCAATAATTGGGCCAAAGGTCATTACACCGAAGGCGCTGAGTTGA  
TCGACGCTGTGCTCGACGTCGTTTCGTAAGGAGGCTGAGAATTGTGATTGCTTGCAAGG  
TTTTCAGGTTTGCCACTCACTTGGAGGAGGTACAGGTTCTGGCATGGGAACTCTCTTG  
ATATCAAAGATTAGAGAGGAATATCCAGACAGGATGATGATGACTTTCTCTGTCTTCC  
CTTCTCCTAAGGTCTCTGACACAGTCGTGGAGCCATACAATGCAACCCTTTCTGTGCA  
TCAGTTGGTTGAGAATGCTGATGAATGCATGGTTCTTGACAATGAAGCACTTTATGAT  
ATTTGCTTCCGGACTCTAAAGCTTAGCACTCCAAGCTTCGGAGACTTGAATCACTTGA  
TTTCTGCAACTATGAGTGGTGTACATGCTGCCTGAGGTTCCCAGGTCAACTCAACTC  
TGACCTCAGGAAGCTGGCTGTTAATCTGATTCCGTTCCCACGTCTTCATTTCTTCATGG  
TGGGATTTGCACCGCTCACCTCATATGGATCCCAGCAATACATCTCCCTCACTGTGCC  
CGAGCTGACTCAGCAAATGTGGGATGCCAAGAATATGATGTGCGCAGCTGACCCCCG  
CCATGGCCACTACCTCACAGCCTCAGCTATGTTTCAGAGGAAAGATGAGCACCAAAGA  
GGTGGATGAGCAGATGATTAATGTGCAGAACAAGAATTCATCATACTTTGTTCGAGTG  
GATCCCCAACAAATGTGAAGTCCAGTGTGTGTGATATTCCACCTAGGGGTTTGAAGATG  
GCATCTACTTTTCATTGGTAACTCCACGTCTATCCAAGAGATGTTTCAGGAGGGTGAGTG  
AGCAGTTTACTGCCATGTTCCGGCGCAAGGCCTTTTTGCATTGGTATACTGGGCGAGG  
GTATGGATGA

#### ***$\alpha$ -TUB***

ATGCTGTTGGAGGTGGTACTGGTTCGGACTCGGGTCACTTCTCTTGGAAACGACTCTCT  
GTTGACTATGGCAAGTAAATCAAAGCTTGGTTTCACTGTGTATCCTTCACCTCAGTTTT  
CCACATCAGTTGTGGAGCCTTACTACAGTGTCTTTCAACCCATTCCCTCCTTGAGCAC  
ACCGATGTTGCTGTGCTTCTTGATAATGAAGCCATCTATGACATTTGTAAGCGTTCTCT  
TGACATTGAGCACCCCACTTACACCAATCACAACCGATTAATCTCTCAGGTGATTTCA  
TCCCTCACTGCTTCTTTGAGGTTTGATGGAGCTCTGAATGTGGATGTGACCGAGTTCCA  
GACCAATCTGGTTCCTACCCGAGGATTCATTTTCATGCTTTCCTCTTATGCTCCAGTTA  
TTTCTGCGGAGAAGGCATACCATGAGCAACTTTCAGTTGCTGAGATCACCAACACTG  
CGTTTGAGCCATCATCCATGATGGCCAAATGTGATCCTCGTCATGGAAAATACATGGC  
TTGTTGCTTGATGTTTCGTGGTAATGTTGTGCCTAAGGATGTGCATGCAGCTGTGGCCA  
CCATCAAGACGAAGCAGACAGTCCAGTTTGTTGATTGGTGTCTCTACTGGATTCAAGTG  
CGGTATCAACTAA

#### ***Actin-100***

ATGACCCAGATAATGTTTGAAACCTTCAATGTGCCTGCTATGTATGTTGCTATCCAGG  
CCGTGCTTTCCCTTTATGCCAGTGGTCGTACAACAGGTATGGTCTTAGATTCTGGTGAT  
GGTGTACGCCATACAGTACCAATTTATGAAGGCTATGCGCTCCCTCATGCTATCCTTC  
GTTTGGACCTTGCTGGCCGTGATCTAACGGACTCCTTAATGAAGATCCTCACTGAGAG  
AGGGTATTCTTTCACCACTACTGCTGAGCGGGAAATTGTCCGTGACATGAAGGAAAA  
ACTTGCGTATGTTGCCCTTGATTATGAGCAAGAGTTGGAGACTGCAAAGAGCAGCTCT  
GCGGTTGAGAAAAGTTATGAGTTGCCTGATGGGCAGGTGATTACAATCGGAGCTGAG  
AGGTTCCGTTGCCCAGAAGTACCTTTCCAGCCATCTTTGATTGGAATGGAAGCTGCTG  
GAATTCATGAAACCACTTACAACCTCCATCATGAAGTGTGATGTTGATATCAGGAAAG

ATCTGTTGGAAACATTGTGCTTAGTGGTGGTTCAATTATGTTCCCTGGTATTGCTGATC  
GGATGA

***β-TUB2***

ATGGGAACCCTGTTGATATCAAAGATCAGAGAGGAATATCCTGACAGGATGATGATG  
ACTTTCTCCGTCTTCCCTTCTCCAAAGGTCTCTGACACAGTCGTGGAGCCATACAATG  
CAACCCTTTCTGTGCACCAGTTGGTTGAGAATGCTGATGAATGCATGGTTCTTGACAA  
TGAAGCTCTTTATGATATTTGCTTCCGGACTCTAAAGCTTAGCAATCCAAGCTTCGGA  
GACTTGAATCACTTGATTTCTACAACCTATGAGTTGTGTCACTTGCTGCCTGAGGTTCCC  
TGGTCAACTCAACTCTGACCTCAGGAAGCTGGCTGTTAATCTGATCCCATTCCCACGT  
CTTCATTTCTTCATGGTGGGATTTGCACCTCTCACCTCACGTGGATCCCAGCAATACAT  
CTCCCTCACTGTGCCCCGAGCTGACTCAGCAAATGTGGGATGCCAAGAATATGATGTG  
TGCAGCTGACCCCCGCCATGGCCGCTACCTCACAGCCACAGCTATGTTTCAGAGGAAA  
AATGAGCACCAAAGAGGTGGATGAGCAGATTATTAATGTACAGAACAAGAATTCAT  
CATACTTTGTAGAGTGGATCCCCCACAATGTGAATTCCAGTGTATGTGATATACCACC  
AAGGGGTTTGAAGATGGCATCTACTTTTATTGGTAACTCCACGTCTATCCACGAGATG  
TTCAGGAGGGTGAGTGAGCAGTTTACTGCCATGTTCCGTCGCAAGGCCTTTTTGCATT  
GGTATACTGGTGAGGGTATGGATGAAATGGAATTCACGGAGGCAGAGAGCAACATG  
AATGACTTGGTGGCAGAGTACCAACAATAA

Text S2: Sequences of pathway genes.

### ***DXS***

ATGGCTCTCTCTGCATTCTCATTTCCAACCTCACGTCGACAAAGCAACAATTTTCAGTTCC  
TCGAAAGTCTTCTCTGCTTACTTCTCATTTCTTGGGAGCTGATATTTTTTCCCATTTTTCT  
CATAAGCTCATCAATCAGCAGATACAGCTCAAGAAAAGGCCAAATGGGGTTTGTGCA  
TCACTTTCAGAAAGAGGAGAATATCACTCACAAAGACCACCAACACCTCTATTGGAC  
ACCATAAACTATCCAATTCACATGAAAAATCTATCTATCAAGGAGCTTAAACAACCTAG  
CAGATGAGTTGCGGTCAGATGTCATAGTCAATGTTTCGAAAACCTGGGGGTCAGTTAGG  
CTCAAGTCTTGGTGTGGTTGAGCTTACTGTGGCTCTTCATTATGTTTTCAATGCTCCTAA  
AGACAGGATACTATGGGATGTTGGTCATCAGACTTACCCTCATAAAATCTTGACTGGG  
AGAAGAAATAAGCTGCATACCATGAGGCAAACAGATGGCCTTTCGGGATTCATAAG  
CGATCTGAGAGTGAATATGATTGCTTTGGAACCGGCCACAGTTCCACTAGTATCTCTGC  
TGGATTGGGTATGGCCGTGGGTCTGGGATCTTAAAGGAAGAAGGAATAATGTGGTTGCT  
GTTATTGGTGATGGTGCCATGACTGCAGGCCAAGCTTATGAAGCCATGAACAATGCTG  
GGTACCTAGATTCTGACATGATTGTTATTCTTAATGACAACACACAAGTTTCTTTACCCA  
CTGCTACTCTAGATGGGCCCATAACCACCTGTCGGTGCTTTGAGCAGTGCTCTCAGCAG  
GTTGCAGTCAAACAGGCCTCTCAGAGAACTTAGAGAGGTTGCAAAGGGAGTTACTAA  
GCAAATAGGTGGGCCAATGCATGAACGGGCTGCAAAAGTTGACGAATATGCTCGTGG  
GATGATCAGTGGTTCTGGGTCATCACTGTTTGAAGAACTTGGACTGTATTATATTGGTC  
CTGTTGATGGTCACAATATAGATGACCTTGTTGCCATTCTTGAAGAGGTTAAGAGTACC  
AAAACAACAGGTCCAGTTCTGATCCATGTTGTCACTGAGAAAGGCAGGGGATATCCAT  
ATGCTGAAATGGCTACAGACAAGTACCACGGTGTGGCAAAGTTTGATCCAGCCACTG  
GAAAGCAATTCAAATCCGGTGCCAGGACCCAGTCTTATACAACATACTTTGCAGAGGC  
TTTGATTGCAGAAGCTGAGGTGGACAAGGATATTGTTGCTATCCATGCTGCAATGGGA  
GGTGGAACAGGACTGAATCTCTTCCTTCGTCGTTTCCCTACTAGATGCTTTGATGTTGG  
GATAGCAGAACAGCATGCTGTTACTTTTGCCGCTGGTCTGGCCTGTGAAGGCCTTAAA  
CCTTTTTGTGCTATCTATTCGTCTTTCATGCAAAGGGCTTACGACCAGGTAGTACATGAC  
GTGGATTTGCAGAAGCTGCCTGTAAGATTTGCAATGGACAGAGCTGGACTTGTTGGAG  
CTGATGGTCCCACTCATTGTGGGTCTTTTGATGTCACCTTTTATGGCGTGCCTTCCTAACA  
TGGTGGTAATGGCTCCTTCTGATGAGGCAGAGCTTTTTTACATGGTTGCAACTGCTGCT  
GCCATAGATGACCGGCCTAGCTGTTTCCGCTACCCAAGAGGAAATGGGATTGGTGTTG  
AACTGCCACCAGAAAACAAAGGCACTCCCCTTGAGGTTGGGAAAGGCAGGATACTG  
ATTGAAGGGGAGAGGGTTGCACTCTTGGGCTATGGGACAGCTGTTCAAAGCTGTTTAG  
CTGCTGCTTCTTTATTGGAATCCCATGGGTTACGGCTGACTGTAGCAGATGCTCGATTCT  
GTAAGCCACTGGATCATTCCCTCGTTCGTAGCCTGGCAAATCACACGATGTTTTGATT  
ACCGTGGAGGAAGGATCAATTGGGGGTTTTGGTTCTCATGTTGCTCAGTTCTTGGCACT  
TGATGGTCTTCTTGATGGCACCATCAAGTGGAGACCACTCGTACTCCCTGATCGATATA  
TCGATCATGGAGCACCTGCTGATCAGATAGCTCAAGCTGGTCTCACACCATCTCACATT  
GCAGCAACAGTATTTAACATTCTTGGACAAACAAGAGAGGCTCTCGAGATAATGTCAT  
TCAAAAACCTAA

### ***DXR***

ATGGCTTTGAATTTGCTATCCCCAGCTGGAACCAAAGGTCTCTCTTTCTTGGATACCAC  
GAGGTCCCATCACCGTCTCCCCAAGCTGTCAGGTGGGTACCTTGGAAGAGGAAGGA  
TAATGGAACGGTGACGTTTGAAGAATAGTTCAATGTTCTGCTCAAGCACTTCCTCCA

GCGTGGCCAGGCCGAGCTGTTGCAGAATCCTTTCGTAAGACTTGGGATGGTCCAAAGC  
CAATCTCAGTGCTCGGATCAACTGGTTCTATTGGTACTCAGACATTGGATATAATTGCG  
GAACATGAAGATAAATTCAGAGTTGTGGCACTCGCAGCTGGTTCAAATGTTACTCTTC  
TAGCTGATCAGGTGAAGAGATTCAAACCTAGACTAGTTGCTATCAGAAATGAGTCATT  
ACTTGATGAACTCAAGGAGGCTTTGGCTAATGTTGAACACAAGCCTGAGATTGTGGCT  
GGGGAGCAGGGAGTTCTTGAGGTTGCCCCGACACCCAGATGCCGTCACCGTAGTGACA  
GGGATAGTAGGTTGTGCAGGATTAAAGCCTACGGTTGCAGCAATAGAAGCAGGGAAA  
GACATAGCGTTGGCCAATAAGGAGACCATGATTGCTGGTGGTCCTTTTGTCTTCCTCT  
AGCTCACAAGCATAATGTAAAAATTCTTCCAGCTGATTCAGAACATTCTGCCATATTTT  
AGTGTATTCAAGGCCTGCCTGAGGGTGCACCTTCGGCGTATTATTTTAACTGCATCTGGC  
GGGCCCTTCAGGGAATGGCCGGCTGAGAACTGAAAGAAGTTAAAGTAGCTGATGCA  
TTGAAGCATCCTAACTTTACTCTGGGAAAAAAGACTACTGTGGAGTCTGCTACAGTTTT  
CAACAAGGGTTTAGAAGTAATTGAAGGCCATTACTTATTTGGAGCTGAATATGATGATA  
TTGAGATAGTAATTCATCCACAGTCAATCATACTCAATGGTTGAAACACAGGATTCC  
TCTGTTATTGGACAGTTGGGGTGGGCTGATATGCGCATACCACTCCTTTATACAATGTCT  
TGGCCAGAAAGAATTCCTCCTCTGAATTGACATGGCCTCGCCTTGATCTTTCCAAGCT  
TGGTTCATTAACATTTATGGCTCCTGACACTGAAAAATTTCCATCCGTGAATCTTTGCTA  
TGCTGCTGGACGAGCTGGAGGCACAATGACAGGAGTTCTTAGTGCAGCAAACGAGAA  
AGCAGTAGAGATGTTTCATCGATGAAAAGATTAGCTATCTGGATATTTTCAAGGTTGTGG  
AGTTAACGTGTGATAAGCACCGGGCAGACTTGGTGACCTCGCCATCCCTGGAAGATAT  
ATTACATTATGATGCGTGGGCACGAGATTACGCAGCTAGTTTGCAAGTTTCATCCAGTA  
GAAGCCCTGTTCCGGCATGA

#### *ISPD*

ATGGGGCTTCTTCAACTGAACCTAGCTCTATCTTCTTCAACGTCCAACCACCAAACCTT  
CTCTAGAACTGGTTATAAAAATAATTTCTTTGACTTGACAAGGAAGGCCAGGATTTCCA  
TACCCAAGATTAGATGTTCTGCAAAAGTTGATAATGGTTCTGTTGTTGTAAAAGCTAAT  
AGTGTATCAGTTATTCTTTTGGCTGGAGGAAAGGGCAAAGAATGGGTGCGAGCATGC  
CAAAGCAGTATCTACCCCTTCTGGGTCAACCGATTGCATTGTATAGTTTCTACACTTTCT  
CGCGCATGATTCAAGTGAAGGAAATTGTGGTAGTTTGTGATCCATCTTACAGTGACATC  
TTCGAATAA

#### *ISPE,*

ATGGCTATGGCGTCCTCTTATTTGCAGTTCAATCACCACCACCAACTCCATCTACCTTC  
GATTAGCCCTAATGGGTTTTCTTCTTTCAAACCAAAAGTTCATTTTCGCAGGACCCAAC  
TTGTCAAATGTACCAGAAAACAAGTCGAGATAGTGTATGATCGTGATGAAAGATTAAA  
CAAGTTGGCAGATGAAGTAGACAGGGATGCTCCTCTTCAAGGCTCACTCTGTTCTCA  
CCTTGCAAGATAAATGCTTTTTTGAGAATTACAAACAAGAGAGAAGATGGGTATCATG  
ATTAGCATCTCTTTTCATGTAATTAGTTTAGGTGATACAATTAAGTTTTCTTTGTCACC  
GTTGAAGACTAAGGATCGTTTGTCAACCAATGTGGCAGGGATACCTCTTGATGACAAT  
AATTTGATAATTAAGGCCCTTAACCTCTATAGAAAGAAGACAGGCAGTGACAATTTCT  
TTTGGATTCACTTGATAAAAAGGTGCCTAGTGGGGCAGGACTTGTGTTGGTGAAGCAG  
CAATGCAGCCACTGCACTTTGGGCAGCAAATCAATTCAATGGTTCTGTTGCCACAGAG  
ACGGAACCTCCAAGAATGGTCAAGTGAGTTTGGTTCAGATATTCCCTTCTTTTTCTCCA  
TGGAGCAGCTTATTGCACTTGTAGAGGTGAGGTTGTTCAAGATATTCCCCACCCATAC  
CTATGGATGTCCCAATGGTTCTTATAAAGCCCAAGGAGGCATGTCCCACGGGTGAAGT

GTACAAGCGTCTTCGACTTGATCAAACCAGTAAGGTTGATCCTTTAACATTGCTCGTGC  
AGATTTCAAGGAACGGATTGACTCAAGATGTTTGTATCAATGATCTGGAAGCACCGGC  
ATTTGAAGTTCTCCCATCTCTTAAAAGATTGAAACAGCGTATAATTGCAGCTGGCCGTG  
GACAATATGATGCTGTTTTTATGTCTGGCAGCGGTAGCACTATTGTTGGCATCGGCTCC  
CCAGACCCTCCACAGTTTATCTATGATGACAACGAGTATCATGATGCATTTTTGTCAGA  
GGCTCGGTTTATCACTCGTGAAGTGAATGACTGGTATAGAGAACCCGCTTCGACAAAC  
GATTGTAGCCAACCCCTGCATTTTCCGGAACCTGAGGGGTGA

#### *ISPF*

ATGTCCTCCTCCTTTGAGCCTCGTAGCTTATCCACCAAACATCTCCGGTCAACGTCGTT  
GCCTCGTTTCTCAGTTTCAGTTTCAGCTGCAGCCGCAACTTCCTTCCAAGTCAAAGAGT  
CATCGACTTCAATCCAAACGTCCAAATCAAATCACTTCCTTTTCGTGTGGGCCATGG  
GTTTGATCTTCACAGATTGGAACCTGGCTACCCTCTGATCATCGGTGGCTTCGATATTCC  
CCACGATAGAGGCTGCGAGGCTCACTCTGATGGTGATGTTTTGTTACACTGTGTTGTGG  
ATGCGATTTTGGGAGCACTGGGGCTTCCGGATATGGTCAGATATTTCTGATAATGATC  
CTAAGTGGAAGGGTGCACCATCCCCTGTTTTATTAAAGAAGCTGTTAGACTCATGGA  
TGAGTCAGGATATGAGATTGGCAACATGGCTGCCACGTTGA

#### *ISPG*

ATGAGGAATTCAAATTCCAGTTCGAATATCGCAGAGCTTCAGCCTGCATCAGAAGTTA  
TTCCCCGACAAAAGTATTGTGAATCCATTTACAAAACAACCAGGCGGAAAACACGGA  
CAGTGATGGTGGGAAATGTTGCAATGGGTGGTGAGCATTCTATTAGATTTAGACAAC  
GACTACAACGGATACTAAGGATGTTGCTGGAACAGTTGAACAGGTAATGAGAATAGC  
TGACCTGGGAGCAGATCTTGTTTCGGATTATAGTTCAAGGGAAGAGAGAGGCAGATGC  
ATGTTTTGAGATAAAAACTCACTTGTGAAGAAAAATTACAATATACCTCTGGCGGCA  
GATATTCAATATTATCCCCCTTTTGCCTACAAGTTGTTGAATGCTTTGACAAAATCCGT  
ATCAACCCAGGAAATTTGCTGCTAGACGGGCTCAATTCGAGCAGCTAGTGTATACAG  
AAGAGGACTATCAGAAAGTACTTGAGCATATTGAGGAGGTTTTTACTCCATTGGTTGA  
AAAATGTAAGAAGTATGGAAGGGCAATGCGTATTGGGACAAACCGTGGGAGTCTTTC  
AGATCGTATCATGAGTTGCTATGGGGATTCTCCTTGGGGAATGGATGGTTTGGGTGATA  
TAATCAGGGTTTCGCTCACAGAAGCACCAGAGGAGGAGATATATCCTTGCAGAATTTT  
GGCCAACCTGGGTATGAGAGCGCTGAGCTTCAGAAAGGAGTGGCACCATTTGAGGAA  
AAGCACAGACAATATTTGATTTTCATCGTCGTTCTGGTCAACTGCCAATTCAAAGAA  
GGGTGAGGAGGTGATTACGGATTTGTTCTGCACCGTGATCGCTCAGTTCTCATGTCCG  
TTTCTCTGGATCAGTTAA

#### *ISPH*

ATGGAGCTCATGAATCAAGAGTACACAAGTGATATTATAAAGATATTGAAAGAGAATG  
GAAATGAGTATACTTGGGGGAATGTACAGTGAAGCTGGCCGAATCATATGGTTTTTG  
CTGGGGAGTTGAACGTGCCGTGCAGATTGCTTATGAAGCAAGAAAACAGTTTCCTGA  
AGAAAGGATTTGGATTACCATTGAAATCATTCACAACCCGACTGTTAATAAGCGGTTG  
GAGGAGATGGAAGATCAGAATATACCTGTGACGAAGGAAAGAAGCAGTTAGATGTT  
GTAATAAAGGGTAATGTTGTGGTTTTGCCTGCATTTGGGGCTGCAGTGGAGGAAATGG  
TCACTCTAAATGACAAGAATGTACAGATTGTTGATACTTGGCGTTGGGTGTCTAAG  
GTCTGGAATACTGTTGAGAAGCACAAGAAGGGAGACTACACTTCAATTATTCACGGTA  
AATACTCTCATGAGGAACTGTAGCAACTGCATCTTTTGGGGGAAAGTATATCATAGTA  
AAGGATATGAAAGAGGCTTTGTACTTGTGTGATTACATTCTCGGGGGTGAACCTAATGG

ATCTAGCTTAACAAAAGAAGCGTTCCTTGAGAAATTTAAGAAAGCTGTTTCAAAAGG  
GTTTGATCCAGAAATTGACCTGATAAAACTGGCATTGCAAACCAAACCTACAATGCTC  
AAGGGTGAACAGAAGAGATTGGAAAATTAGTTGAGAAGACCATGATGCGTCAAATA  
TGGAGTGGAAAATGTCAACGAACACTTCATAAGCTTCAACACAATTTGTGA

#### **ACAT**

ATGAAAGCTACAATGCTTGCAGCACAGAGTATTCAGTTGGGGATCAATGATGTTGTTG  
TGGCTGGAGGCATGGAAAGCATGTCTAACACTCCTAAATATCTGGCAGAAGCAAGGA  
AAGGGTCTCGACTTGGACATGATTCTCTAGTTGATGGAATGCTTAAAGATGGGTAAAG  
GGATGTTTATAATGATTGTGGCATGGGAACTTGTGCTGAACTATGTGCTGATCAACATT  
CGATAACAAGGGAGGATCAGGATAACTATGCTGTTTCAAGAGCTTTGAGCGTGGCATTGC  
AGCCCAAGATGCTGGTGCCTTTACATGGGAAATTGTTTCATGTTGAAGTTTCTGGGGGA  
AGGGGAAAACCGTCAACCATTGTTGATAAGGACGAAGGTTTAGGCAAGTTTGACCCG  
GCAAAATTGAGGAAGCTTCGACCAAGTTTCAAGGATAATGGAGGAACTGTTACTGCT  
GGCAATGCCTCTTGATAAGTGATGGAGCTGCAGCATTGGTTCTAGTGAGTGGAGAGA  
AAGCACTTAAGCTTGGTCTGCAAGTGATTGCGAAGATCACAGGATATGCTGATGCTGC  
TCAGGCACCAGAGAACTTTACAACAGTTCCAGCCCTAGCAATACCAAAAGCTATTTCA  
AATGCTGGATTGGAGGCTTCTCAAGTTGATTTTTACGAAATAAATGAGGCCTTTGCTGT  
TGTGGCCCTTGCAAACCAGAAATTGCTCGGACTAAATCCTGATAAGGTTAATGTGCAT  
GGTGGAGCTGTATCATTGGGACACCCTCTGGGTTGCAGTGGAGCTCGTATCTTGGTCA  
CACTTTTAGGGGTGCTTAGGCAGAAAAATGGGAAATACGGTGTGGTGGCGTTTGCAA  
TGGAGGAGGTGGTGCATCGGCGCTTGTTTTAGAGCTTGTGTAA

#### **HMGCS**

ATGTCTCATGCCTATGATTTCTATAAGCCAAACCTTGCTAGCGAATACCCGGTTGTTGAT  
GGGAAACTTTTCTCAGACATGCTACCTCATGGCTCTTGATTCTTGTTACAAACAATTATG  
TAGCAAGTACGAGAACTGGAGGGCAAACAATTTTCTCTTTCTGATGCTGAGTATTTCT  
GTGTTCCATTCTCCATATAATAAGCTTGACAGAAAAGCTTTTCTCGTTTGTTGTTAAT  
GACTTCACGAGGGATGCCAGTTCTGTTGACAAGGCTGCCAAAGAAAAGCTGGGACCA  
TTTTCAACCTTATCTGGTGATGATAGCTACCAAAGCCGGGACCTAGAGAAGTTGTCCC  
AACAACCTTGCAAGGCCCTTTATGATGCAAAGGTCCAACCATCCACTTTAATACCAAA  
GCAAGTTGGTAACATGTATACAGCATCTCTCTATGCGGCATTTGCTTCCCTTGTTTACA  
ACAAACAGTGTGAATTGGATGGCAAGCGAGTGGTTTTGTTCTCCTATGGAAGTGGTTC  
AACTGCCACAATGTTCTCATTGAACTTAATGAAGGTCAACATCCCTTCAGCTTGTCA  
AACATCGTATCTGTATGAATGTTGCTGGGAAGTTGAAGTCAAGGCATGAGTTTCCTCC  
AGAGAAGTTTGTGGAAGTAATGAAGATAATGGAGCATAGGTATGGAGCCAAGGACTT  
CGTGACGAGCAAAGGACAGTAG

#### **HMGCR**

ATGGACGTCAGCCGGCGGCCTACGAGAGCAGCACGTGTCGACGAGAACAAAGAGAA  
GCGATCGACGTCACCGACGCCAAAAGCATCAGACGCGTTGCCGCTTCCGTTATACCTA  
ACTAACGCCATTTTCTTACGCTGTTCTTTCCGTTGCGTTTTACTTGCTTACCGTTGG  
CGTGACAAGATCCGTAACCTCAATCCCCCTCCACGTGGTCACTCTTTCCGAAATTGCCG  
CCATTGTCTCGCTCATCGCTTCCTTCATCTACCTCCTTGGCTTCTTCGGCATTGATTTCTG  
CCAGTCGTTTATCTCACGCGCCTCACCTGACGCGTGGGATCTCGATGACGATAACGAA  
CAAATCAATGAAATCATCTCCCGTCCTACCGCTCCGATTTCCAAATTAGTCCCTCTCGA  
TCCCATAATTACAACTCTGTCTCCGTCGAAGACGAGGAAATCGTTAAATCCGTCATC

GACGGTGC GATTCCGCTCTTACGCGCTCGAATCCAAGCTCGGCGATTGCAAACGAGCG  
GCTGCGATTTCGACGCGACGCATTGCAGAAAATGACTGGGAGGTCGTTGCAGGGATTG  
CCGTTGGATGGATTTCGATTACGAGTCGATTTTAGGTCAGTGCTGTGATATGCCGGTGGG  
GTACGTGCAGATACCTGTGGGCATTGCGGGGCCGTTGTTGCTCGATGGGTTTGAATTCT  
CGTTCCCATGGCGACCACTGAAGGGTGTGTTGCTCGCTAGTGCTAATAGAGGGTGTA  
AGCGATCTATGCTTCCGGTGGGGCCGCTAGTATCTTGTTGAGAGATGGGATGACGAGG  
GCGCCTGTTGTTAGATTTGCTACTGCTAAGAGAGCTTCTGAATTGAAGTCTTTTTTGA  
GGATCCGAACAATTTTCGATACTTTGGCCGTCGTTTTTAACAGGTCCAGTAGATTTCGCTA  
GGCTCCAACATATTCGATGTTCTATTGCTGGGAAGAATCTTTACATCAGATTTTGCTGTA  
GCACTGGTGACGCAATGGGAATGAACATGATATCCAAAGGAGTTCAGAATGTTCTTGA  
ATTCCTTCAAAATGATTTTCCAGACATGGATGTCGTTGGATTATCTGGTATGTCTCTGT  
CATTTTTATAGTTATATTTTTCTTCTTTCAATCGTTATTGAAATTTGGCTTTTTCTCTAG

**MVK**

ATGGTGGTAGTTGCTTCAGCTCCTGGGAAGGTGTTAATGACTGGGGGTACCTTATATT  
GGAGAGACCCAATGCTGGGATTGTGTTGAGTACTAATGCTAGATTTACGCCATTGTTA  
AGCCTCTTTATGAACAACCTCAAGCCTGACAGCTGGGCATGGGCTTGGTCTGATGTTAA  
GTTAACATCGCCTCAGTTGTTGAGGGAAAGTATGTACAAGTTGTCGTTGACGAATTTAA  
ATCTTCAGCCTGTATCTTCAAGTGAATCGCGGAACCCTTTTGTGGAATATGCAGTGCAA  
TATGCCGTGGCAGCTGCACAGGCCGTATTTGATCAGAATAAAAAGGATGTGTTGCGCA  
AACTACTCTTGAGGGTCTTGATATCACAATTTTGGGATGCAATGACTTCTACTCATATC  
GGAATCAGATTGAAGCACGTGGGCTTCCTTTGACACCAGAAGCATTGGCTGCCCTTCC  
ACCCTTTACATCAATAACTTTCAATGCAGAGGAATCAAGTGGAGGAAATTGCAAGCCT  
GAAGTTGCGAAACTGGATTGGGTTTCATCTGCAGCCATGACAACTGCTGTGGTTGCTG  
CATTACTTCATTACCTTGGGGCTGTCAATCTTTCCGCTTTCAGCTGA

**MVAK**

ATGGCAATCTCCGCTCTCTAGTTTCATCATCAAATTTGTTATCATTTTCATTATCTTCTA  
CTTTGGGTCTTTTTAGAAGCCCTCAAATTAGATTCATGAGTTTTTCATAATCAGCATCAG  
AACTCAAATGGACGGTTGGTGATCAACTGTTGCTCTTCTTCTGACATGGGTTCAACTCA  
AAGCCCCATGAATATGAGGCAACCTCAAATGTCATCTATGTCTCCCTTTGGAGTGACAT  
TGAATGACAACGGCATGTCAAAGTCATCCTACAAATGGCAAAGGGTGTGCTTAAAGT  
GAGTGGAGAAGCACTGGCTGGAGATCACACAAAAACATTGACCCAAAGGTTACGA  
TGGCCATTGCTAGAGAGGTTGCATCAGTACTCGCCTTGGCATAGAGGTTGCTATTGTG  
GTTGGTGGGGGAAACATATTCCGCGGGGCCTCAGCAGCAGGAAATAGTGGCCTTGAC  
CGCTCATCCGCTGATTATATTGGGATGTTAGCGACTGTCATGAATGCTATATTTCTTCAA  
TCAACAATGGAGAGTATTGGCATTCCCACCAGGGTGCAGACTGCTTTTCGTATGTCAG  
AAGTAGCAGAGCCATATATACGGCGAAGAGCTGTGAGGCATTTGGAGAAGGGTAGGG  
TTGTGATTTTTGCAGCTGGAACAGGAAATCCATTCTTACCACAGATACTGCTGCAGC  
ACTTCGATGTGCTGAAATTAATGCTGAGGTTGTTTTGAAAGCTACAAATGTTGATGGGG  
TCTATGATGATGATCCTAGACGTAACCTCAAATGCTCGTGTTCTTGATACTCTAACATATC  
ATGAGGTGACTTCAAGACATCTTTCGGTAATGGACATGACTGCAATTACTTTGTGCCAA  
GAAAACAACATTCCAGTTGTGGTCTTCAACCTAAACCATCCCGGTAACATCTCAAAGG  
CCATAAAGGGAGAGAGGGTGGTACATTGATTGGAGGGTCATGGAATTCAACAGTGTC  
AAAGACATGA

**MVD**

ATGGCGGCGGAGAAATGGGTGATGATGGTGACGGGACAGACCCCGACGAACATAGC  
GGTGATTAAGTACTGGGGGAAGAGAGACGAAACCCTAATTTTACCTGTCAATGATAGT  
ATTAGCGTCACTCTTGATCCCGATCACCTCTGTACTACCACTACTGTTGCTGTCAGTCC  
AAGCTTTGATGAAGATCGTATGTGGCTCAATGGAAAGGAAATTCGCTTTCTGGGGGA  
AGGTACCAGAATTGTTTGAGGGAAATCCGGAGTCGGGCTTGTGATGTTGAGGAAAAG  
GAGAAAGGGATCAAGATTGAGAAGAAGGATTGGGAGAAATTACATTTACACATTGCT  
TCATATAACAATTTTCCCACGGCAGCTGGGTGGCTTCCTCTGCTGCCGGTTTTGCCTG  
CCTTGTTTTTTCCCTGGCTAAGCTGATGAATTTGAAAGAAAATCAGAGCCAGCTTTCTG  
CTATAGCTAGGCAAGGTTCAAGGAGTGCTTGTCTAGTCTTTTTGGTGGAATTCGTCAAG  
TGGATAATGGGAAAAGAAGAAAATGGAAGTGACAGCCTTGCTGTTCAACTTGTAGAT  
GAAGAGCACTGGAATGATCTGGTTATTATTATTGCTGTGGTGAGTTCACGGCAGAAGG  
AAACAAGTAGTACCTCAGGAATGCGTGAGAGTGTTGAAACAAGTTTGCTTTTACAGC  
ATAGAGCAAAGGAAGTCGTACCAAAAACGCATAATACAAATGGAAGAAGCCATCCAA  
AATTGTGATTTTTCGTCTTTTGCACAATTGACCTGTGCTGATAGTAATCAATTTATGCT  
GTTTGCTTGGATACCTCTCCCCCTATATTTTACATGATTGATACATCCCACAGGATTATC  
AGCTATGTTGAAAAATGGAATCGTTCCGAGGGATCACCTCAGGTGGCATATACTTTTG  
ATGCTGGCCCGAATGCTGTTCTGATTGCTCGTAATAGAAAGGTTGCTGCCCAATTGCTT  
CAAAGGCTACTTTTCTTTTCCCCCGTCTGATACAGAATTGAACAGTTACGTTCTTGGT  
GATAAGTCAATCCTACAAGATGCCGGCCTTGAGGGGATGAAAGATGTGGAAGCGTTA  
CCACCACCTCCGGAATTAACAACATAGCAGCCCAGAAGTATACAGGGGATGTCAAT  
TATTTTATCTGTACAAGACCAGGAAGAGGTCCTGTTTTGCTTTCTGATGACAGTAAGGC  
TCTTCTCAACCCTGAAACTGGTCTGCCTAAGAAGGCTTAG

#### ***GPP/FPP***

ATGGCTTCAGCTCTCATGAGCAGCTCCATCAATGCTCTCCAACACCACTCAAAAATCA  
CATTATGCGACCCTAAACTTGTCCCAAAGTCAGCCCATGTTCCATATTCATCATTTAAG  
CAACCAATCATATCCAAAACCCTGACGATCAAGTCAAGAAACAAACCCCCCTTGCCA  
GGATTCCAAATTGATGAATACATGACAACAAAAGCAAAGAAAATCAATAAGGCACTA  
GATGAAGCAATTCATCAATATTGCAAAATCCAACGCTACTCGATCACAAAAGGGAA  
CGTGTGTATGGAACCTCTATGCATTGCTTCATGTGAGTTGGTAGGAGGCAATGAATCGTT  
AGTGATGCCACTGGCATGTGCTACAGAAATGTTTCATGACAATGGTTCTTAATCGTACTC  
TTCTCTGCCATGCAATTGAGTATGTGGCAACGAAGACCAACGGAGTTTCGCCTGACCA  
GCTAGTGAAAGCCATCGGCGAAATCACGTCAGCAGTAGGCACAAGAGGAGTCTTGGC  
AGGGCGGATCATGGACATTAAAAGCAAGGGAAAAGAATTGAGTTTGAGTGAATTGGA  
GATCATTACAGAGGCTCAAAATTGGCAAGTTTATTGAGGCTTCGGTTGTGTGAGGATTT  
TAATCGGAGGGGGAAATGAAGAAGAGATGGAGAGGCTGAGGAAGTATGAAAAATGT  
GTAGGCTTAGCGTATCAAGTGTGGGATGATGTTTTAGGTGTGGGGATGGAGGCTGACG  
ATAAGGCAACGTACCCAAAGTTGATGGGTGTGGATGGAGCTAAGAAGTACGCATGGG  
AGCTGGTGGCTGAAGCAATTGAAGTGCTTGCTTATTTTGAAGTCTACGAGGGCTGACCC  
CTTGATCATTTGGCTAATTTTGCGGTTTCTCGACGAATTTAA

#### ***IDI***

ATGGGTGACGCTACTCCTGATGCTACCATGGACGCTGTCCAGCGACGCCTCATGTTCC  
AGGACGAATGCATTTTGGTGGATGAGAATGACCGTGTTGTTGGTCATGAAAACAAATA  
CAACTGTCACCTTGATGGAAAAGATTGAATCTTTGAATTTGCAACACAGAGCTTTAAGT  
GTATTTTGTTTAACTCCAAATATGAGCTGCTCCTTCAGCAACGCTCTGCAACAAAAGT

TACATTCCCTTTTGTGTGGACTATCACCTGCTGCAGCCATCCTCTATTCCGCGAATCTGA  
GCTTATTGAGGAGAATGCTCTTGGGGTGAGGAATGCTGCACAAAGAAAGCTTTTGGAT  
GAGCTGGGTATTCTGCTGAAGATGTGCGGGTTGATGAGTTCCTCCACTGGGTGCGA  
GTCTGTACAAGGCACCTTCTGATGGCAAGTGGGGGGAGCATGAACTTGATTACTTGCT  
CTTCATTGTCCGAGATGTTAATGTTAACCCAACACCCTGA

*SQs*

ATGGGGAGTTTGGGAGCGGTGTTGAAGCACCCAGATGATGTTTACCCGCTATTGAAGC  
TGAAAATGGCGGCGAGGGAAGCTGAAAAGCAGATCCCATCTGAGCCTCACTGGGCCT  
TTTGTTACTCTATGCTTCATAAGGTATCGAGAAGTTTTGCTCTTGTTATTCAGCAGCTCG  
GTA CTGACCTCAGAAACGCTGTTTGCATATTTTATTTGGTTCTTCGAGCCCTGGACACT  
GTTGAGGATGACACCAGCATACCTACAGATGTCAAAGTGCCTACTCTGATAGCTATTC  
ATCGTCATGTGTATGACCATGAATGGCATTTTTCATGTGGTAAAAAGGATTACAAAGTG  
CTCATGGATCAATTCATCATGTTTCAATTGCTTTTCTGGAGCTTGGAAGGTTATCAG  
GAGGCGATTGAGGATATTACCAAAAGAATGGGTGTTGGGATGGCAAAATTTATTTGCA  
AAGAGGTAGAATCAATTGACGACTATTATGAATATTGCCACTATGTAGCAGGACTTGTT  
GGATCAGGTCTGCCAAACTTTTCCATGCCTCTGGGAAGGAAGATCTGGCTCCAGATAA  
TCTCTCGAATTCGATGGGTTTATTTCTTCAGAAAACAAACATCATTGAGATTATCTGG  
AAGATATTAATGAGATACCAAAGTCGCGCATGTTTTGGCCTCGTGAGATCTGGAGTAA  
ATATGTTATTAACTTGTGGACTTAA

*SQE*

ATGGCAGATCAGTACACGTGGGGATGTATATTGGCCGCAGTGCTGGGGTTAGTGGCCG  
CGTATAATCTCGGCCTTCTTGCTCTTTATAATCTTGTTATGAAGAAGAAGAAGAGC  
AACAACAACACTACTACAGATTCCCTCCACAAGACCGCCGCTACTCCTGTTCTAAATG  
GAGAATACCTCTTCCATGCTGACGTCATCGTCGTCGGTGCCGGCGTCGCTGGCGCCGC  
TCTCGCTCACACTCTCGCCAAGAATGGACTTCGAGTGCGTGTGATAGAAAGAGATTG  
TCGGAGCCTGACCGAATTGTTGGTGAATTGCTGCAACCAGGGGGCTACCTAAAATTAA  
TTGAGTTAGGACTTGAAGATTGTGTGGAGGAAATTGATGCTCAACTGGTTTTTGGTTAT  
GCACTTTTCAAGGATGGAAATAATGCCAGACTATCATATCCCTTGGAAGTTTCACTC  
AGATGTTGCAGGGAGGGGATTTTATATTGGACGTTTCATACAGAGGCCGCGGGCGAA  
AGCGGCTTCCCTTCCAAATGTACGATTGGAGCAAGGAACTGTCACCTTCTCTGCTTGAA  
GAAAAAGGGACTATTAAAGGTGTGCAATACAAGACTAAAGCTGGTGAAGAACTGAC  
AGCATATGCTCCTTTGACCATCGTGTGTGATGGCTGTTTTTCAAACCTGCGTCGCTCACT  
TTGCAATCCTAAGGTAGATGTGCCGTCTGTTTCGTTGGCTTGGTCCTTGAGAATTGCA  
ATCTTCCATTTGCAAATCATGGGCATGTTGTACTAGCGGACCCTTCCCCCATTTTGT  
ATCCAATCAGTCGTAACGAGGTTTCGGTGTCTGGTTGATATACCTGGTCAGAAGGTCCCT  
TCCATTTCAAATGGTGATCTGGCAAACCTTTGAAGACAGTAGTTGCTCCTCAGATTCC  
ACCTCAAATCTTTGATTCTTTGTTGCTGCTGTTGATGGAGGAAATATTAACAAATGC  
CAAATAGAAGCTTGCCAGCTGCTCCCCATTCCACTCCTGGAGCTCTTTTGATGGGGGAT  
GCATTCAACATGCGGCATCCATTAACCTGGGGGAGGAATGACTGTGGCACTGTCTGACA  
TTGTCATCCTGAGTAACCTTCTTAGGCATTTGCGTAACCTGAATGATGCACCAGCTCTC  
TGCAAATACCTTGAATCCTTTTACACCTTGCCTAAGCCAGTGGCATCCACTATCAATAC  
ATTGGCAGGTGCCTTGTACCAGGTGTTTTCTGCTTCTCCTGACGAAGCAAGGAAGGAA  
ATGCGTCAGGCTTGCTTTGACTATCTAAGTCTTGGAGGTATATTTTTTCAGGACCCATCT  
CTCTGCTCTCGGGCTTAA

## *CYP*

ATGAGAACTGACATAGAAAGCCTCTGGGTCTTTGCTCTTGCTTCCAAATGCAGAGCCT  
TCACTCAAGAAAACGTTGCATGGTCGCTCTTGATCATGTTTTTAGCTTGGCTAGCCATG  
GCCCTTGTCTACTGGGCTCACCTGGCGGTCCAGCTTGGGGCAAGTATAGGTTCAAAA  
GAGGCTCATCTTTTGTTAAAGCCAACCCAATTCCTGGCCCTAGAGGATTGCCTGTAATT  
GGCAGCATGAGCCTCATGGTGTCTCTGGCACACCACAGGATTGCAGCTGTAGCTGAAT  
CATGCAAGGCTAAGCGGCTCATGGCCTTTAGCATGGGTGATACTCGTGTTATAGTAACG  
TGTAATCCCGAAGTCGCAAAAGAAATTCTAAACAATTCTGTATTTGCTGATCGTCCAGT  
TAAGGAGTCAGCTTACAGTTTGATGTTCAACAGAGCAATTGGTTTTCGCACCTTATGGTG  
TTTACTGGCGGACCCTGAGGAGAATCGCGGCCACTCATCTTTTTTGCCCGAAGCAAAT  
CAAAGGAGCTGAGCCACAAAGATTAGTTATCGCATCTCAGATGGTGACCATGTTTGGG  
GACCATAAAAAAGGTTTTTGCGTACGTGAAGTACTTAAACAAGCTTCACTAAACAATA  
TGATGTGTTTCAAGTTTTTGACGTGAATATAAATTAGATTCGTTCAATAACGAAGTTAAA  
GAGCTAAGAGAATTAGTTGATGAAGGGTACGAGCTACTAGGCATGCTAAATTGGACCG  
ATCACCTTCCTTGGCTAGCAGATTTTGACCCTCAAAAAATCCGGTTTAGATGTGCAACA  
CTCGTACCAAAAAGTGAACCGGTTTCGTTAGTCGAATTATAGCCGAACACAGAGCTCAA  
ACTGACCAAAAAGAATCTGGATTTTGTGCGACGTTTGTCTCTCTTCAAGGCTCAGATAA  
GTTATCAGACTCCGATATGATCGCCGTCCTTTGGGAAATGATATTTAGAGGAACTGATA  
CAGTGGCGGTTTTGATCGAGTGGATACTAGCAAGGATGGTGCTGCATACTGATGTCCA  
ATCAAGGGTGCTAGATGAACTTGACAAGGTTGTAGGCAGATCACGCGCGGTGGTGGA  
GTCTGATCTTGGGGAATTGATCTATCTAACGGCTGTGATTAAAGAAGTTTTAAGGTTAC  
ATCCACCTGGGCCACTTCTCTCGTGGGCCCCGTTTAGCCATATCTGATGCAACCATCGAT  
GGGTATCACGTGCCTGAAGGGACCACTGCAATGGTGAATATGTGGGCCATTTCTAGGG  
ACCCACAAGTGTGGAAGGACCCTCTTGAATTTATACCCGAGAGATTTGTGGCTAAAGA  
GGGTGAGGTGGAATTCTCTGTTCTCGGATCGGATCTCAGGCTGGCTCCGTTTGGGTCA  
GGTAGACGGGTTTGTCCGGGAAAGAACTTGGGCTTAACTGCGGTTAGCTTCTGGGTTG  
CATCACTGTTGCACGAGTATGAATGGCTACCGTCGGATGAGAATGTCGTTGACCTATCT  
GAAGTATTGAGGCTGTCTTGTGAAATGGCCAATCCTTTAACGGTTAAAGTGCGCCAC  
GGCGTAGGTTAAACCTATGTCATTAA

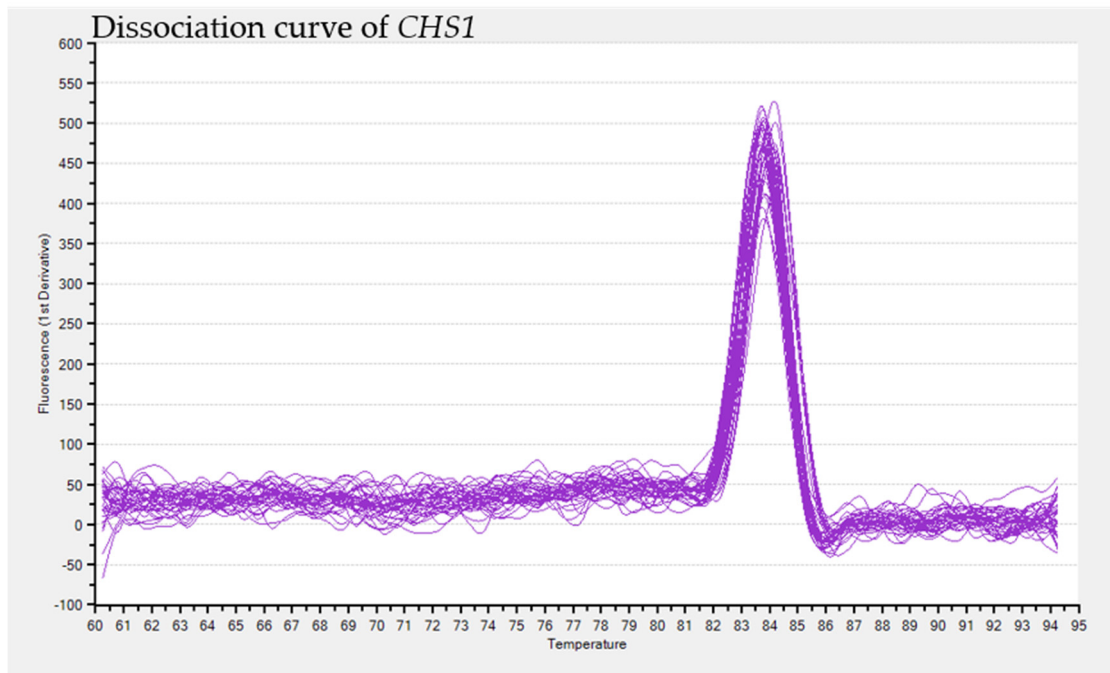

**Figure S1.** Dissociation curve of *CHS1*.

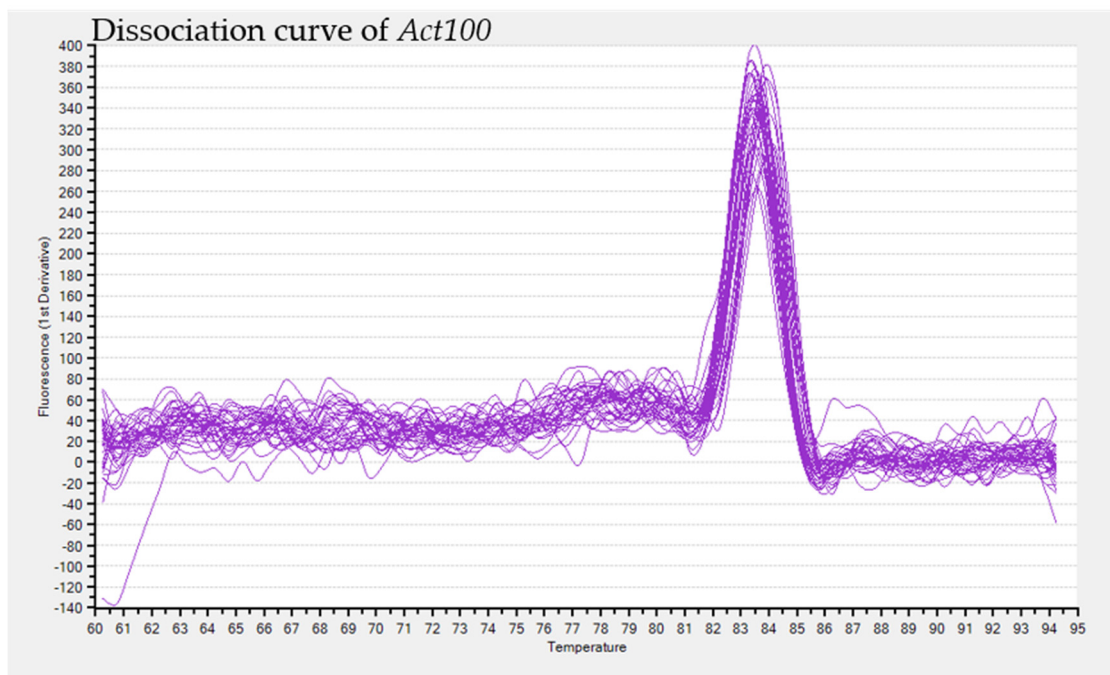

**Figure S2.** Dissociation curve of *Act100*.

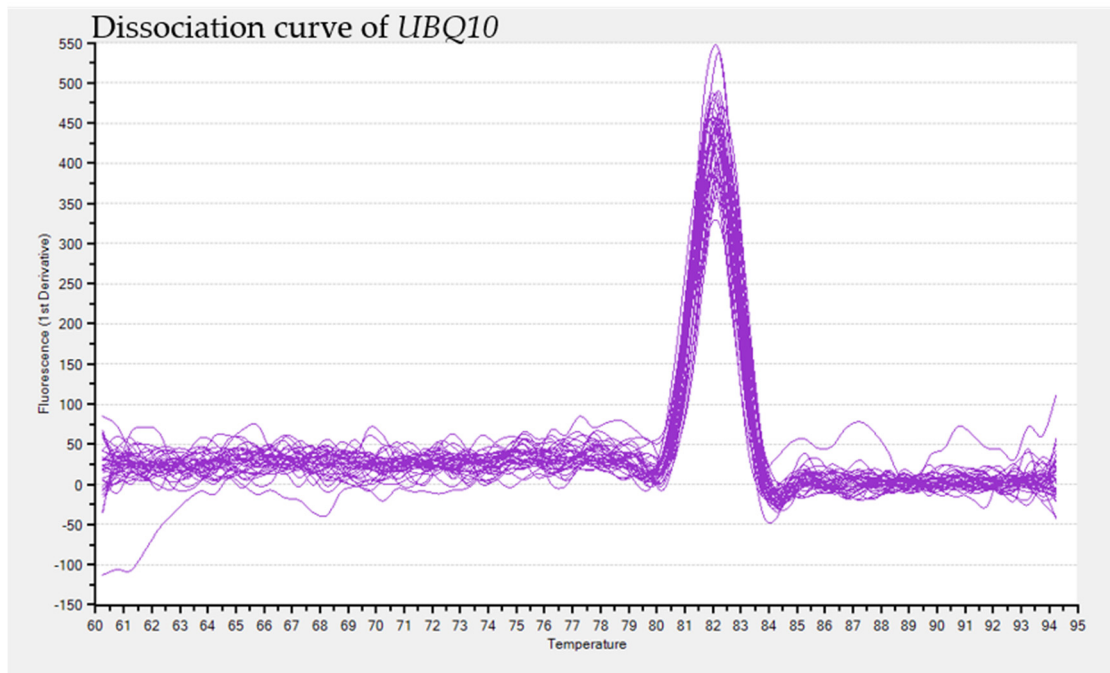

**Figure S3.** Dissociation curve of *UBQ10*.

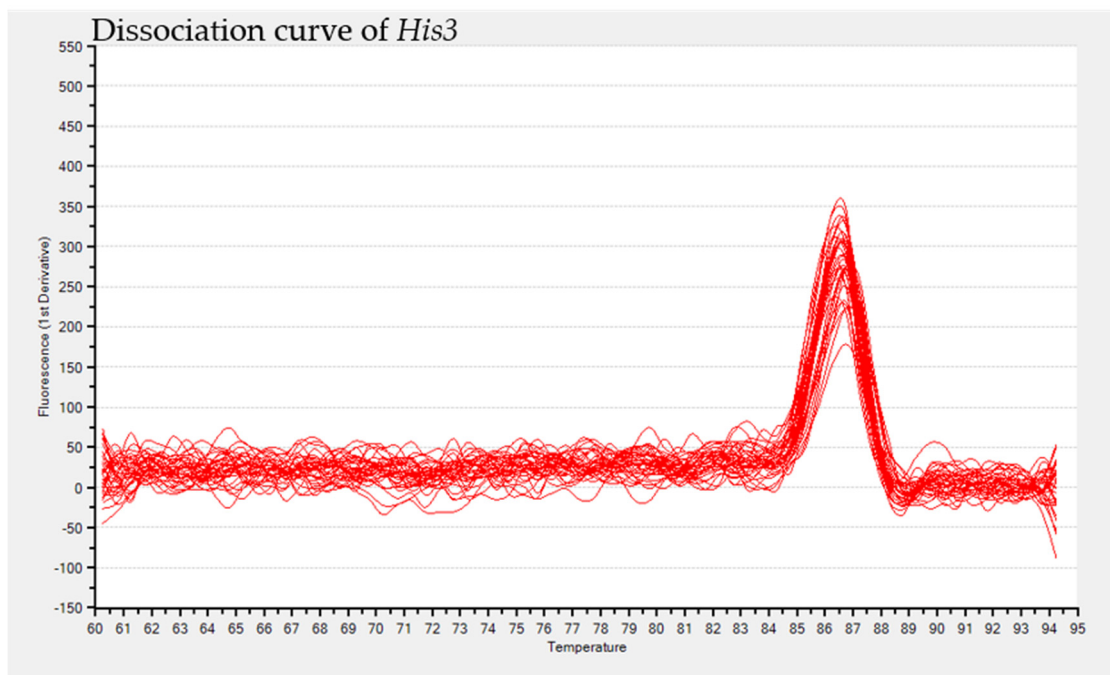

**Figure S4.** Dissociation curve of *His3*.

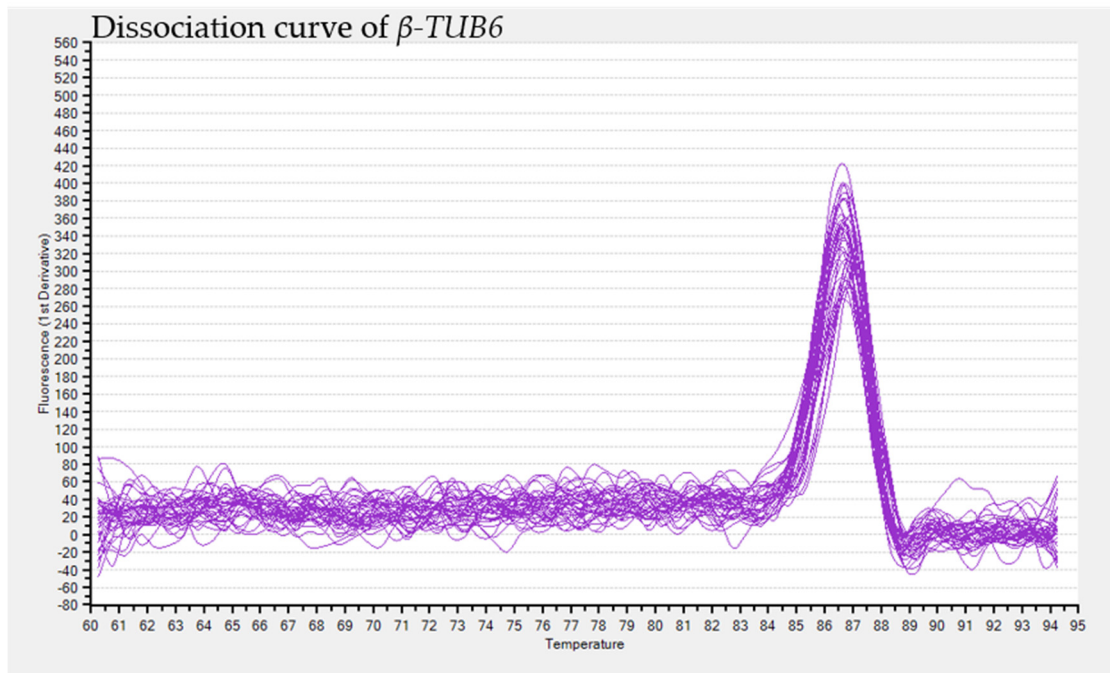

**Figure S5.** Dissociation curve of  $\beta$ -TUB6.

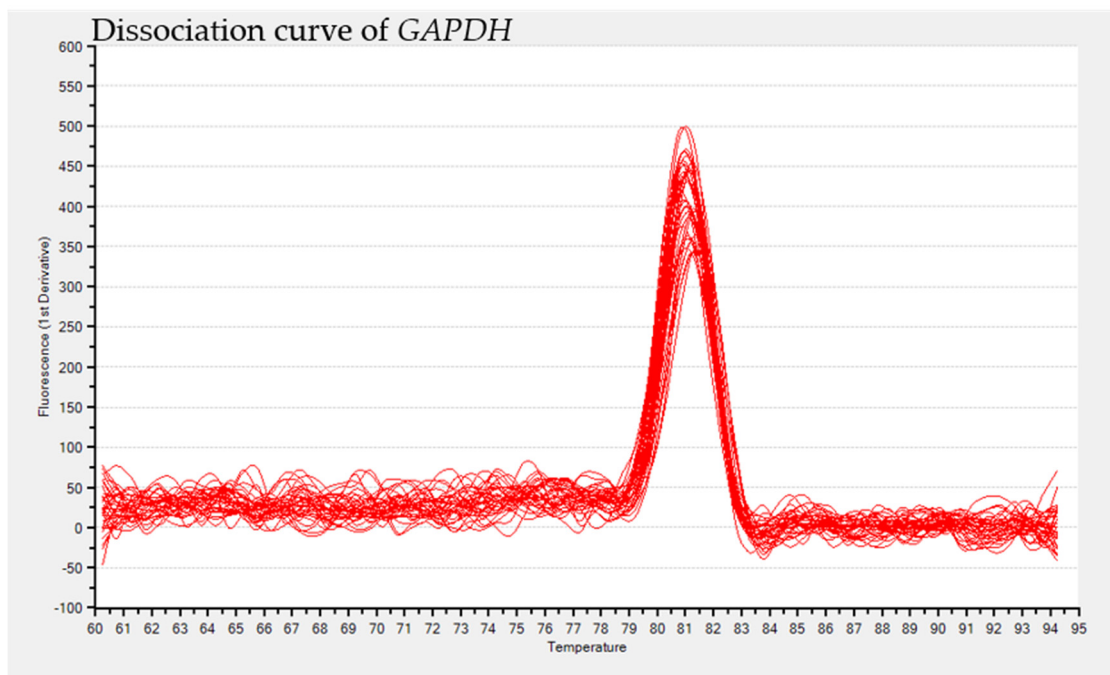

**Figure S6.** Dissociation curve of GAPDH.

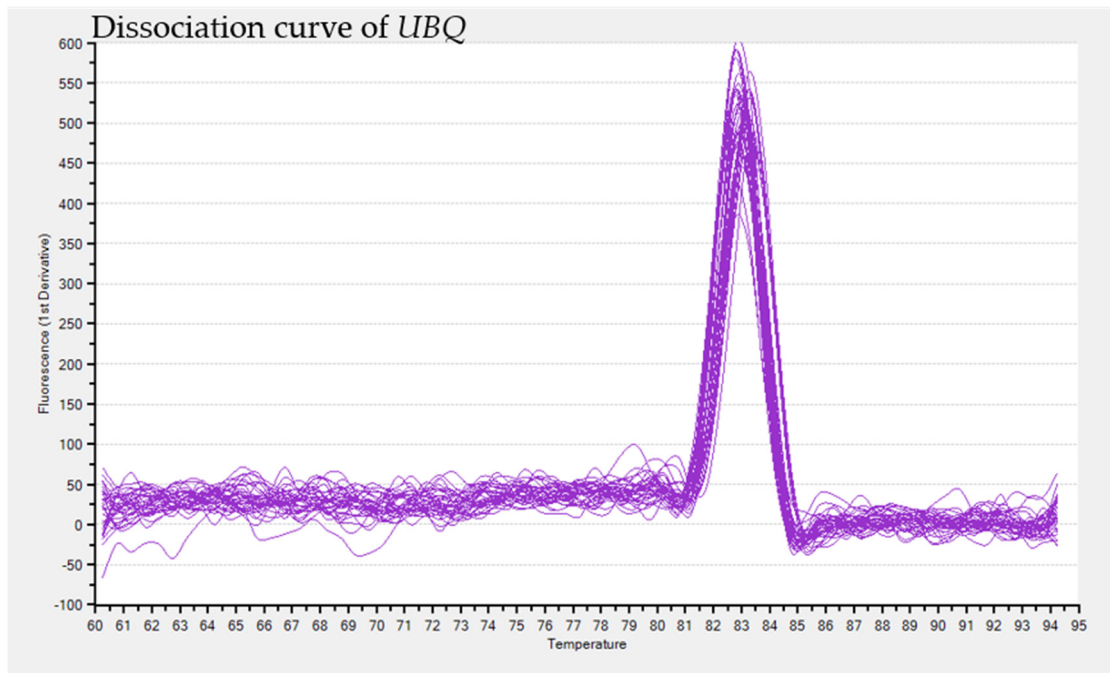

**Figure S7.** Dissociation curve of *UBQ*.

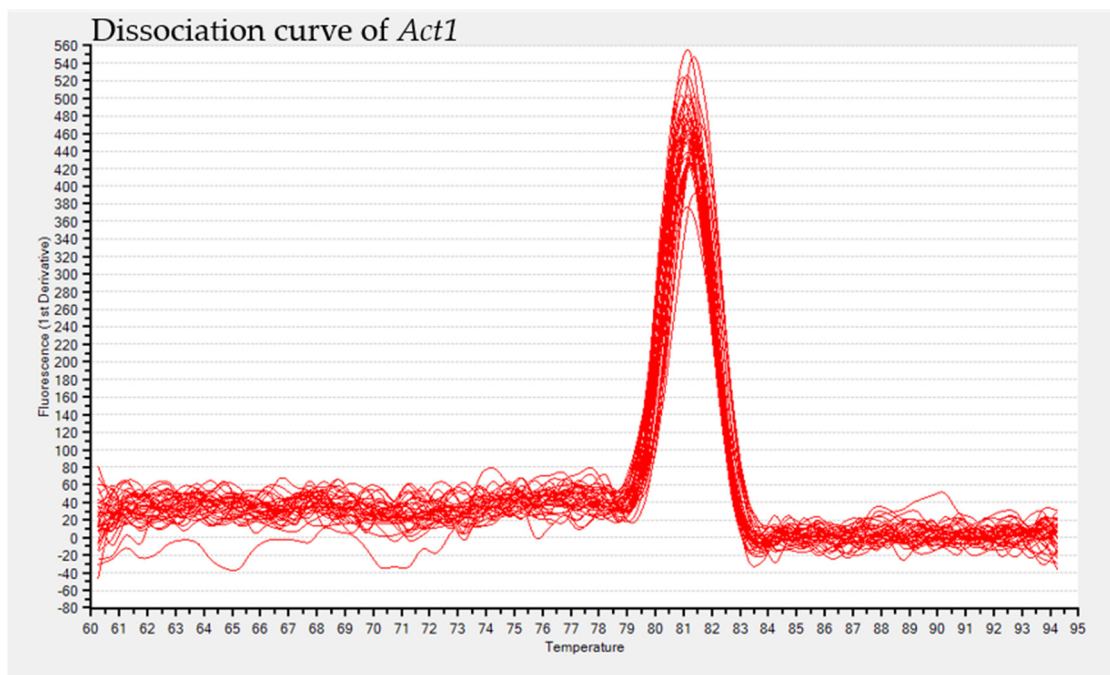

**Figure S8.** Dissociation curve of *Act1*.

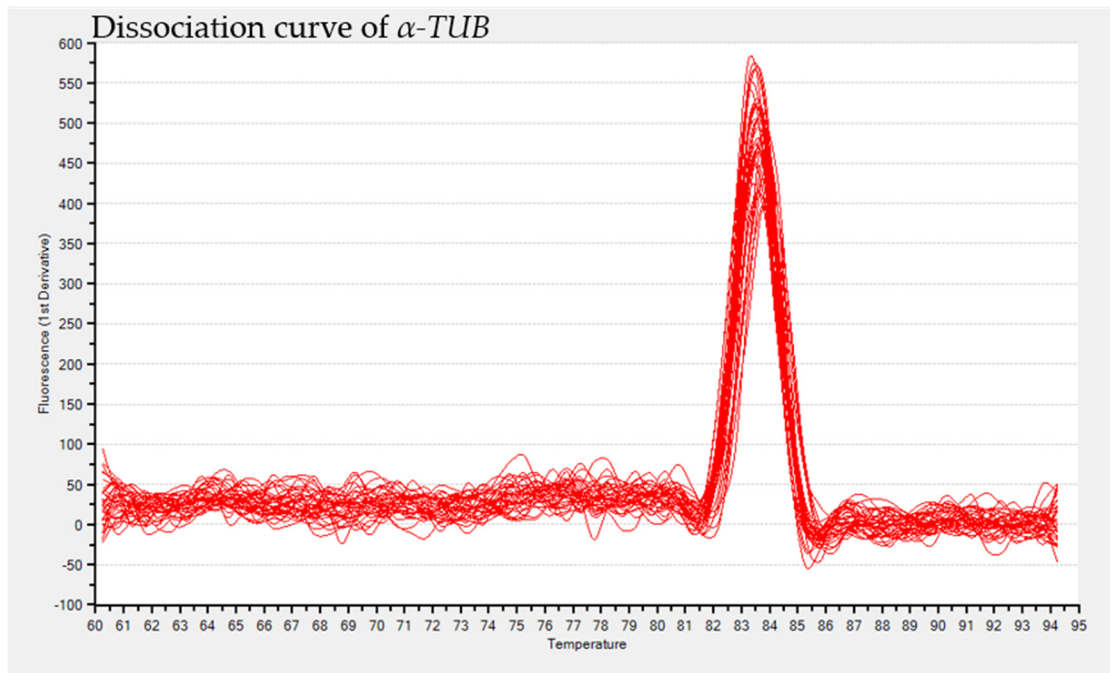

**Figure S9.** Dissociation curve of  $\alpha$ -TUB.

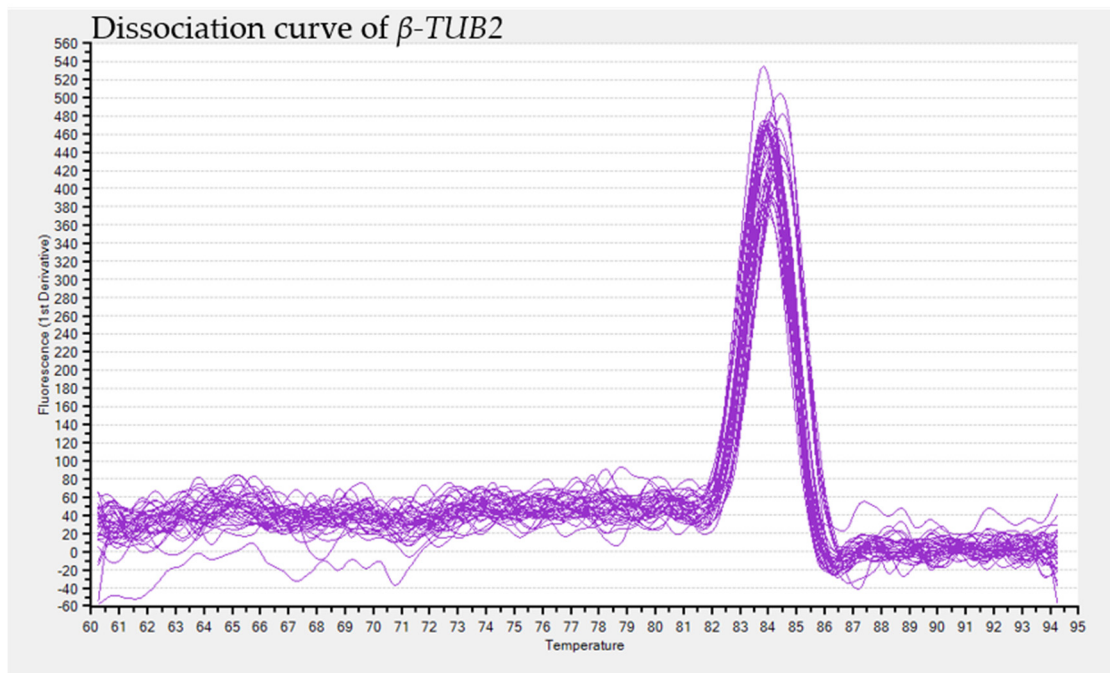

**Figure S10.** Dissociation curve of  $\beta$ -TUB2.

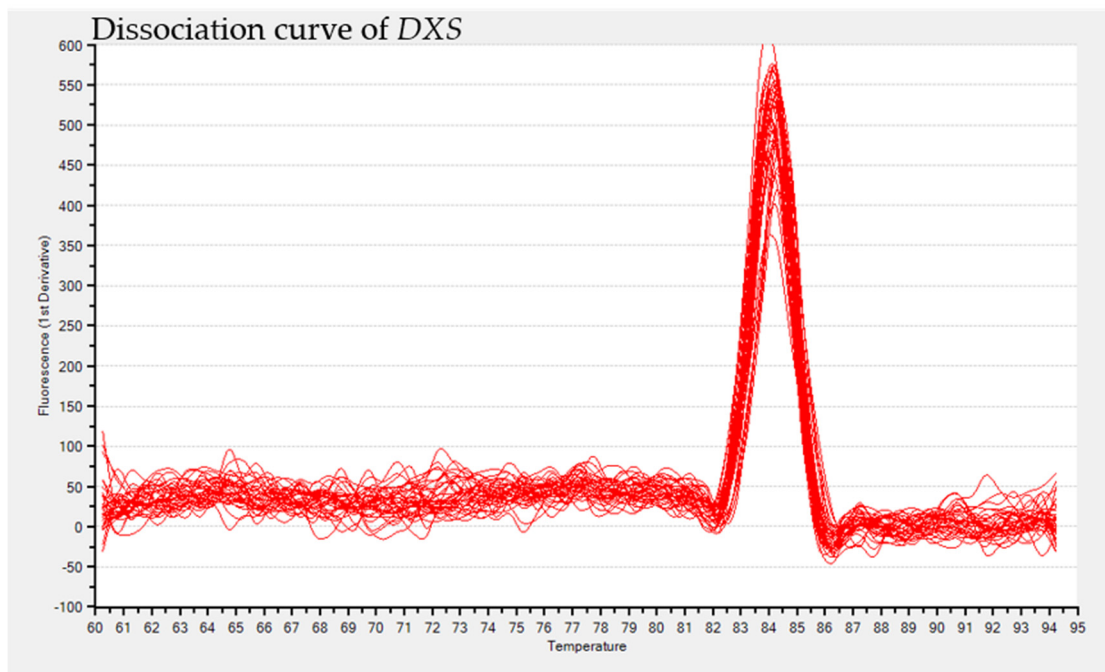

**Figure S11.** Dissociation curve of *DXS*.

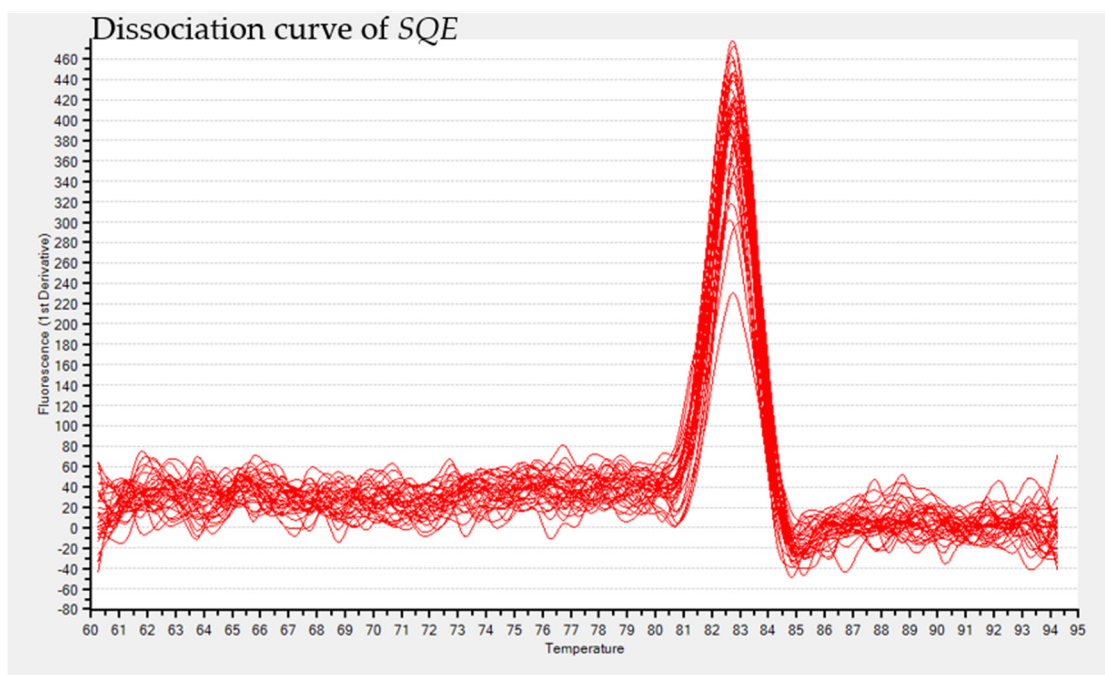

**Figure S12.** Dissociation curve of *SQE*.

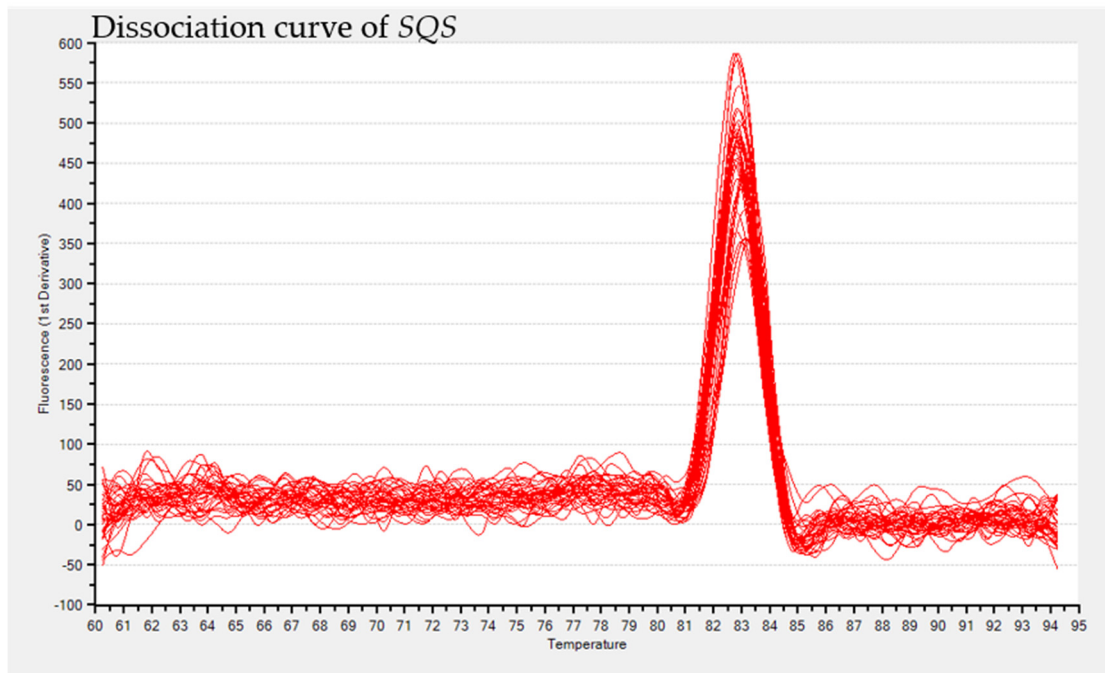

**Figure S13.** Dissociation curve of *SQS*.

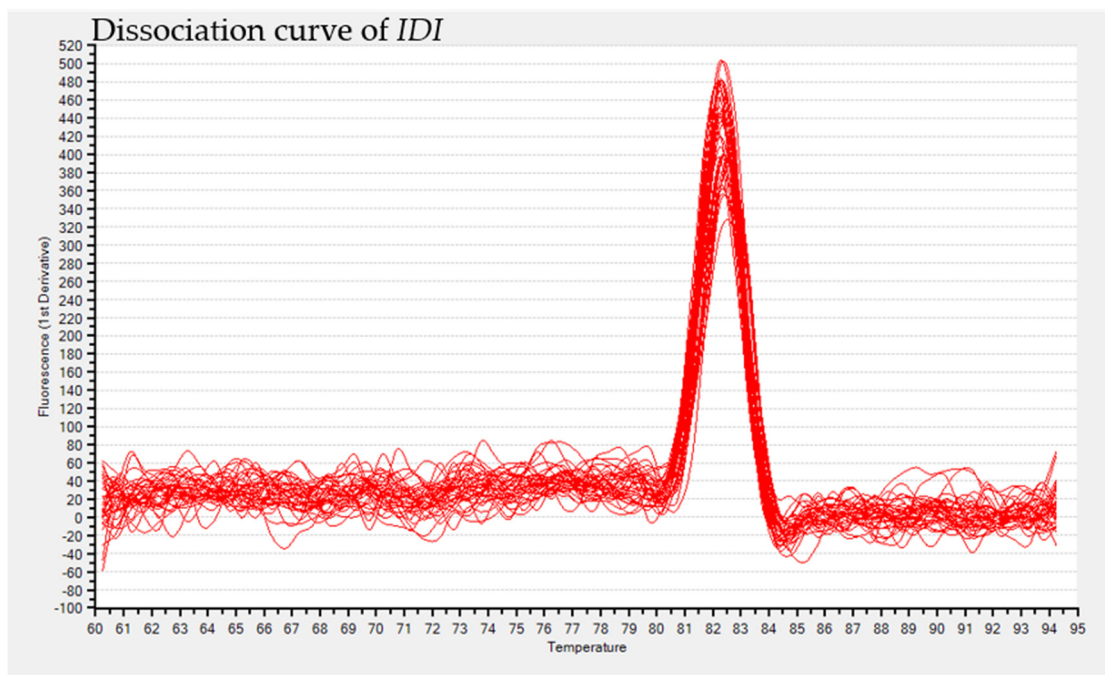

**Figure S14.** Dissociation curve of *IDI*.

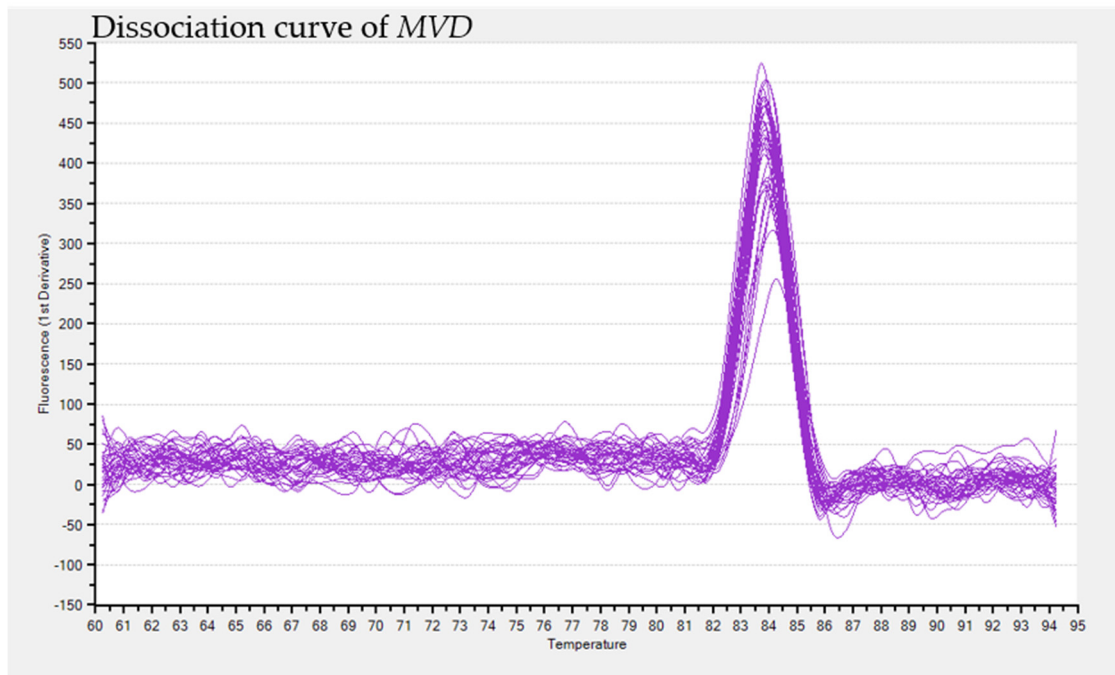

**Figure S15.** Dissociation curve of *MVD*.

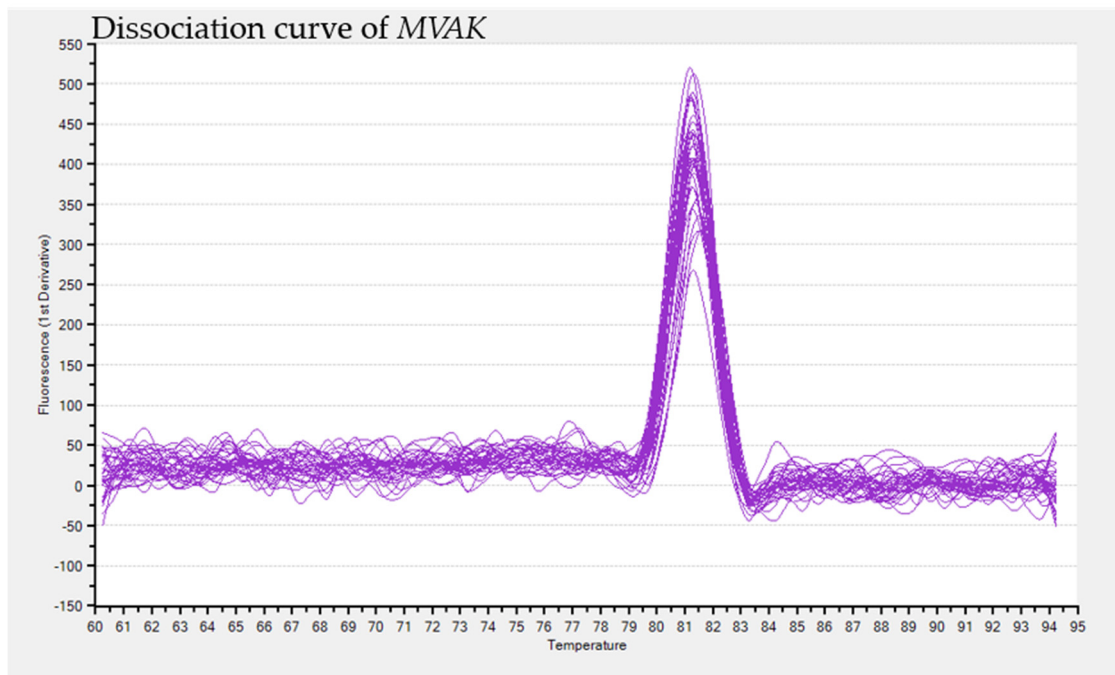

**Figure S16.** Dissociation curve of *MVAK*.

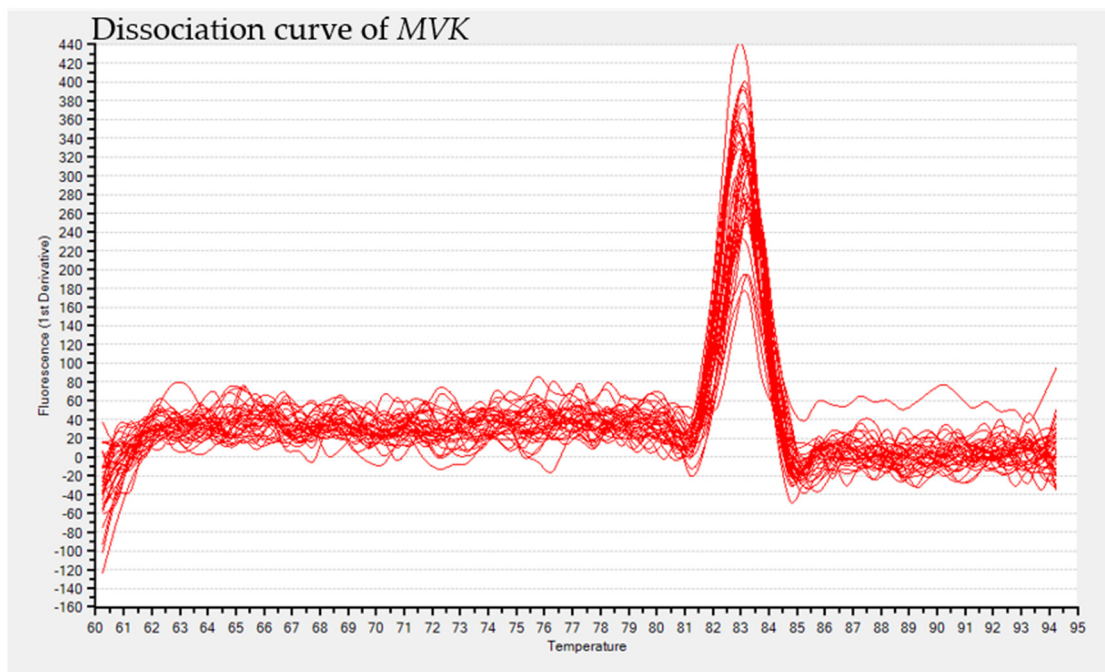

**Figure S17.** Dissociation curve of *MVK*.

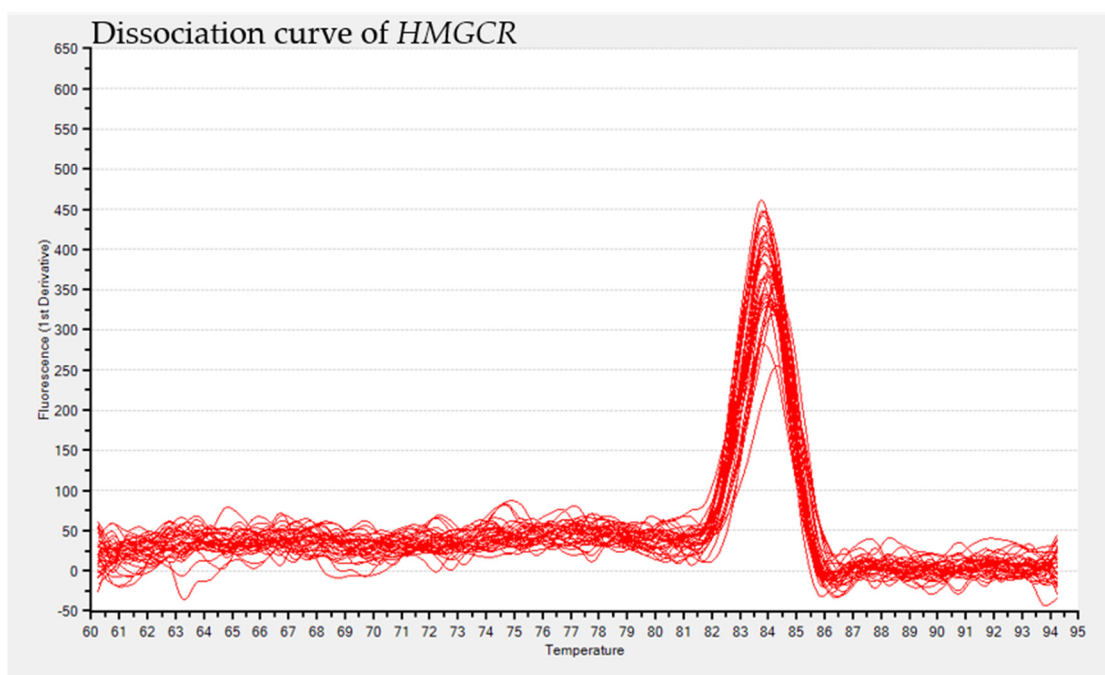

**Figure S18.** Dissociation curve of *HMGCR*.

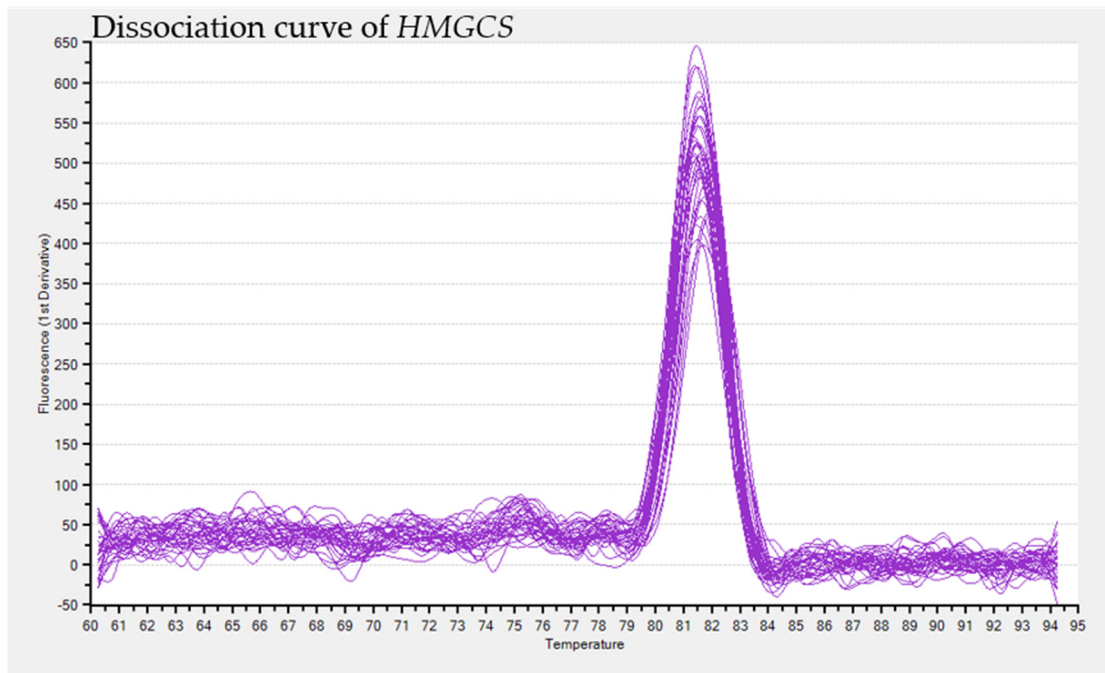

**Figure S19.** Dissociation curve of *HMGCS*.

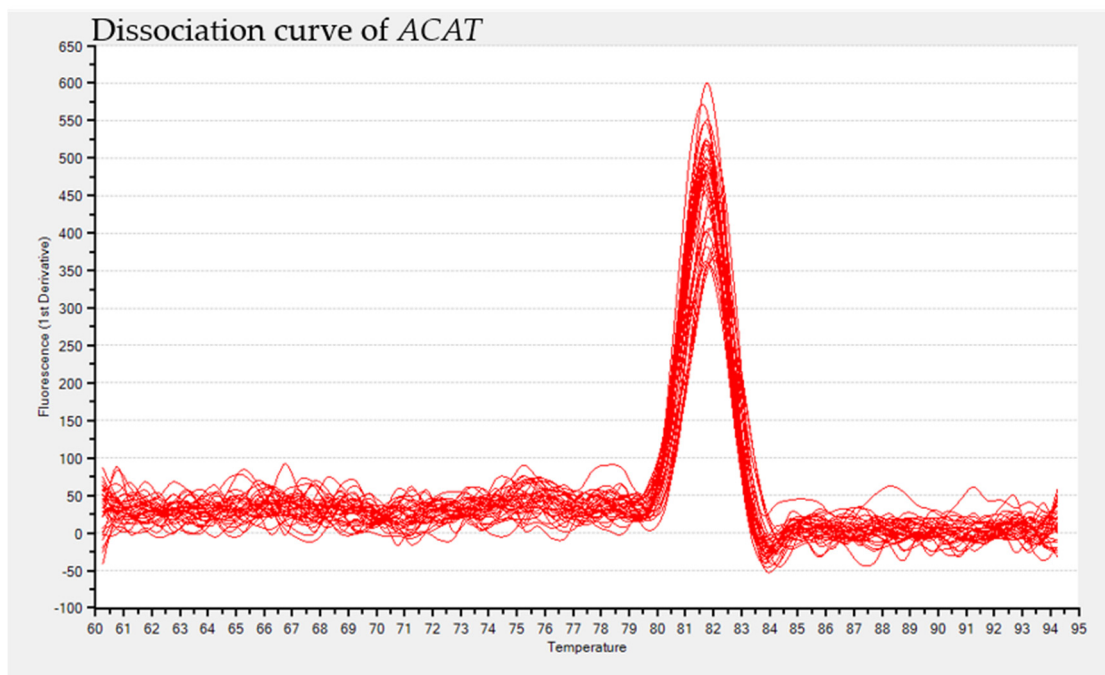

**Figure S20.** Dissociation curve of *ACAT*.

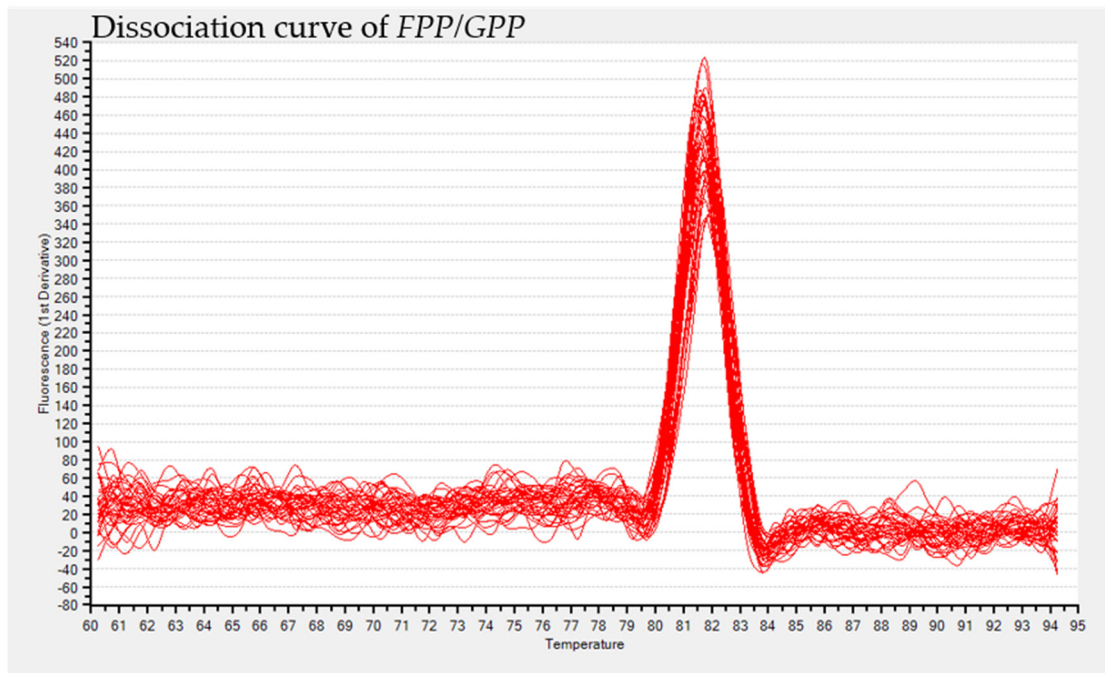

**Figure S21.** Dissociation curve of *FPP/GPP*.

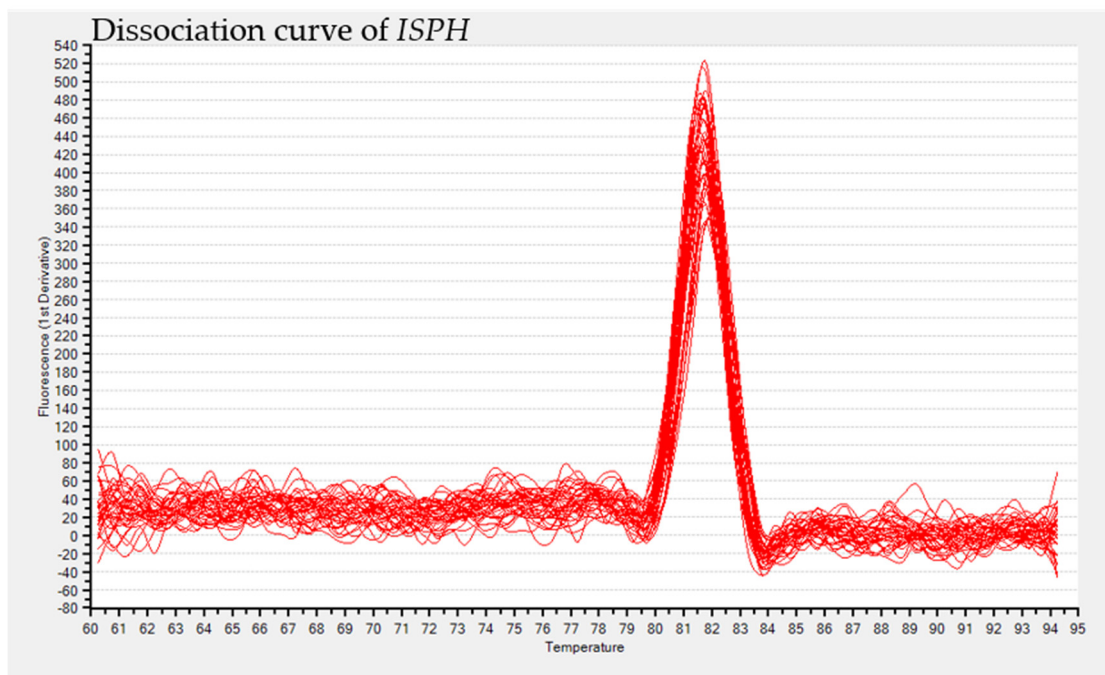

**Figure S22.** Dissociation curve of *ISPH*.

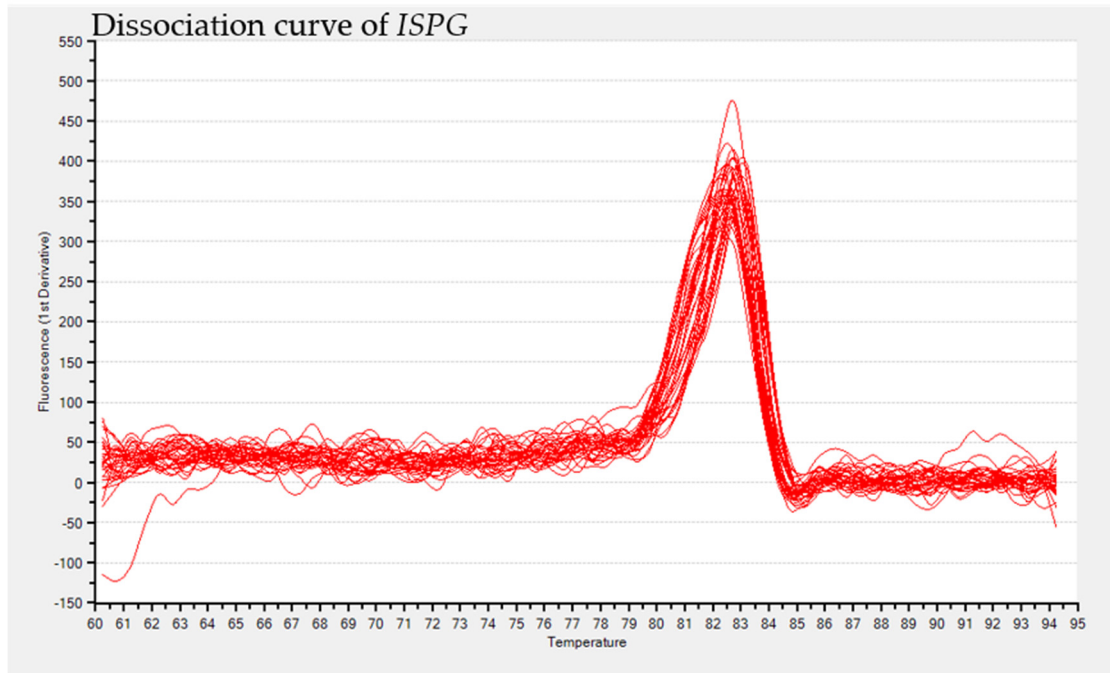

**Figure S23.** Dissociation curve of *ISPG*.

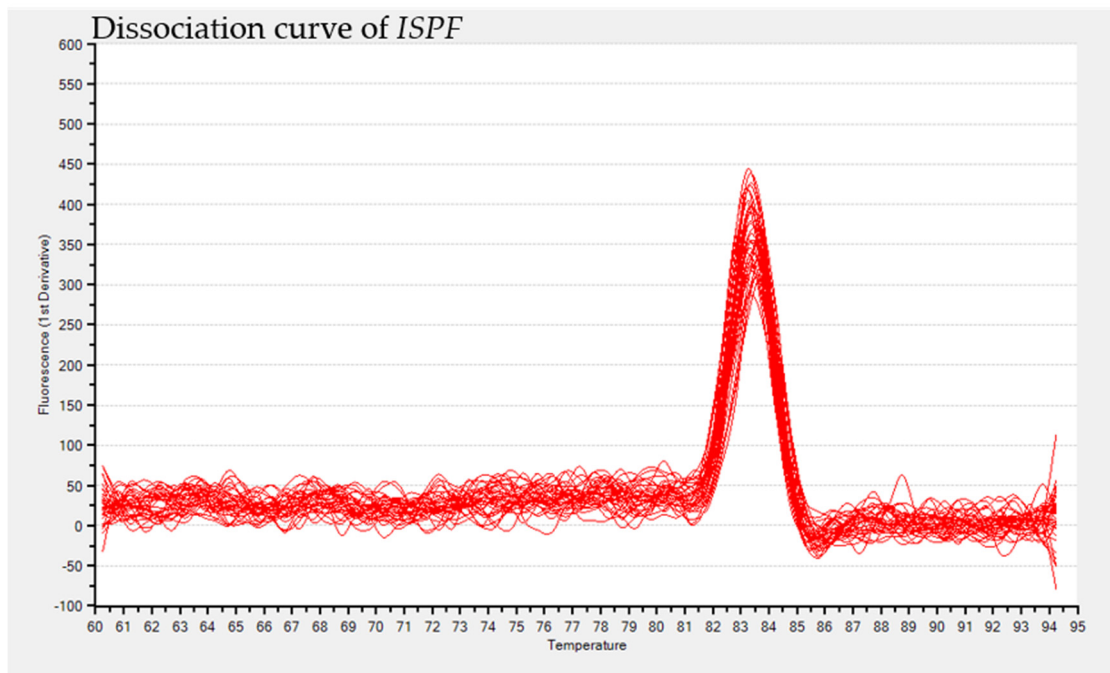

**Figure S24.** Dissociation curve of *ISPF*.

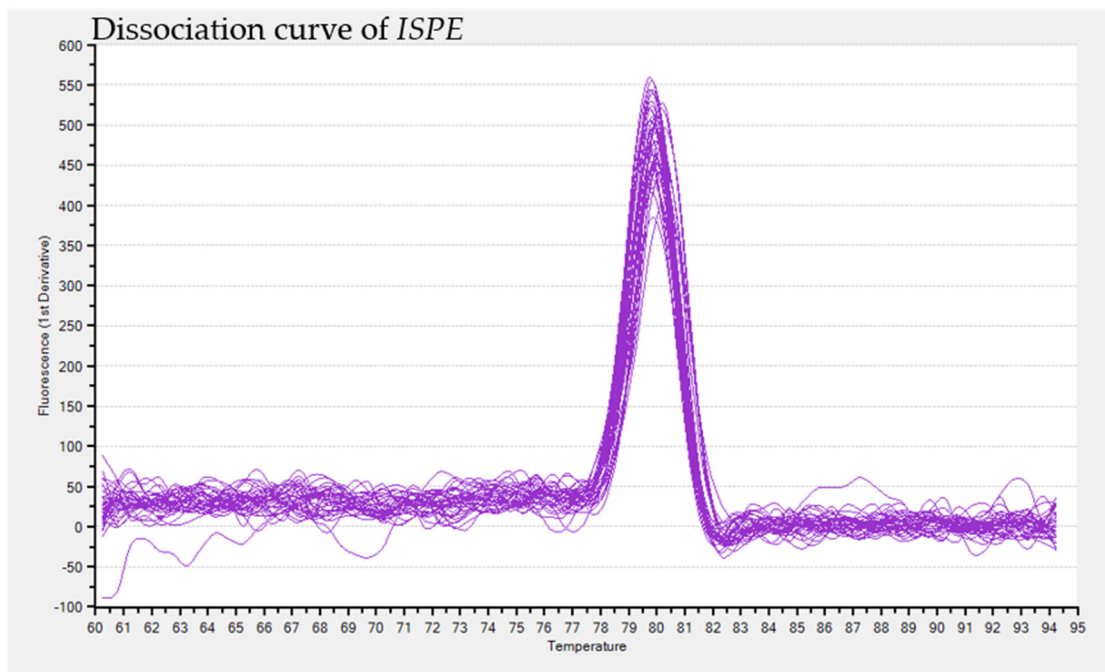

**Figure S25.** Dissociation curve of *ISPE*.

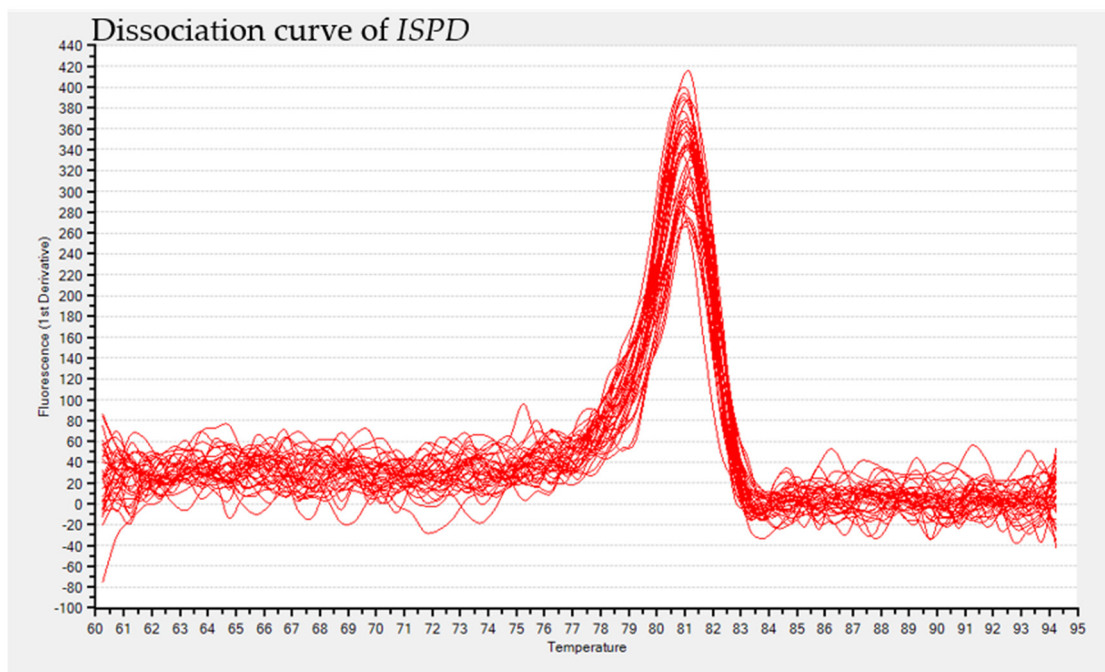

**Figure S26.** Dissociation curve of *ISPD*.

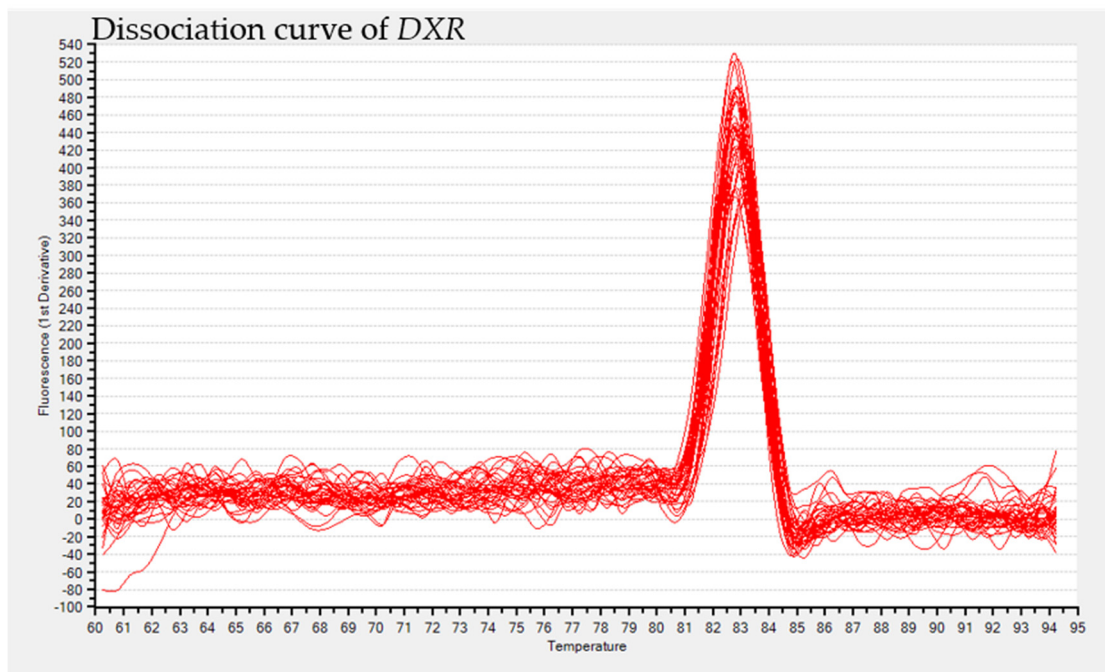

**Figure S27.** Dissociation curve of *DXR*.

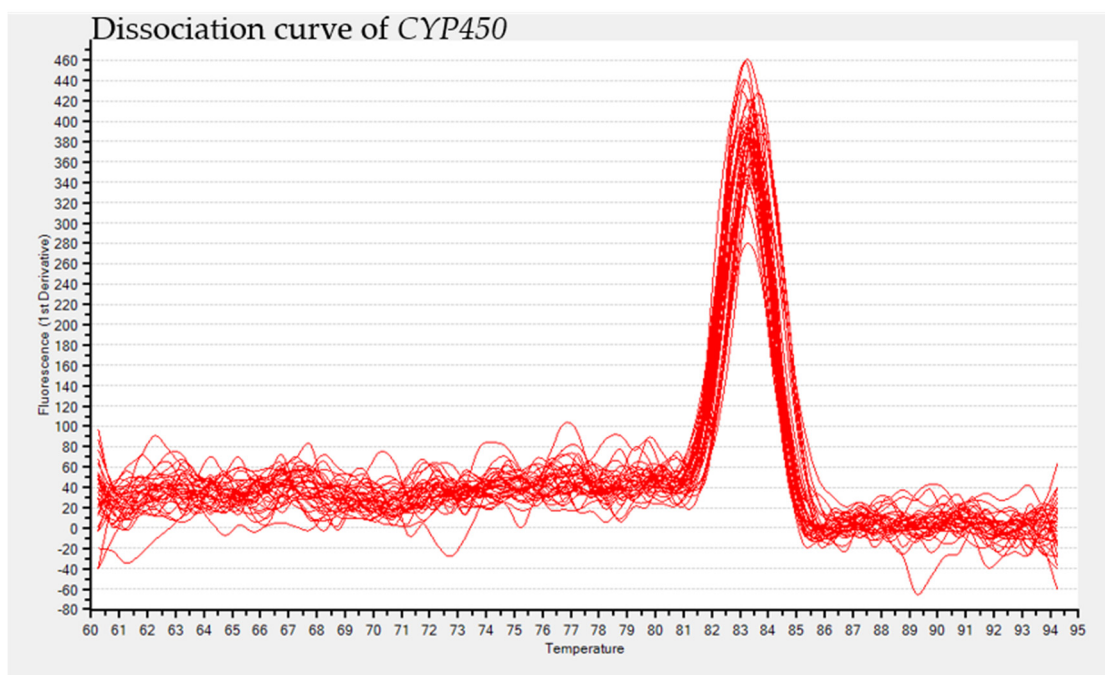

**Figure S28.** Dissociation curve of *CYP450*.
